# Supplementary material for: Homologous and heterologous re-challenge with Salmonella Typhi and Salmonella Paratyphi A in a randomised controlled human infection model
Source: PLoS Negl Trop Dis. 2020 Oct 20;14(10):e0008783. doi: 10.1371/journal.pntd.0008783 (PMC7598925; doi:10.1371/journal.pntd.0008783)
Supplement: S1 Data — (XLSX) [file pntd.0008783.s019.xlsx]

## Sheet: PATCH
Participant	Group	PATCH_Challenge	Time_to_diagnosis_days	Time_to_diagnosis_hours	Time_to_bacteraemia	Time_to_Fever	Diagnosed	Bact_Status	Fever_Status
971855	ST	ST	14.9	14.9	14.9	14.9	0	0	0
826728	ST	ST	5.01181	120.28	5.01181	5.82778	1	1	1
927359	ST	ST	5.96736	152.48	5.96736	5.96736	1	1	0
163428	ST	ST	6.32847	151.88	6.32847	6.32847	1	1	1
938274	ST	ST	14.9	14.9	14.9	14.9	0	0	0
861143	ST	ST	10.1042	242.5	10.1042	10.5833	1	1	1
340781	ST	ST	14.9	14.9	14.9	14.9	0	0	0
920264	ST	ST	4.96319	119.12	4.96319	6.33472	1	1	1
141627	ST	ST	6.42569	202.22	6.42569	14.9	1	1	0
160642	ST	ST	14.9	14.9	14.9	14.9	0	0	0
290182	ST	ST	14.9	14.9	14.9	14.9	0	0	0
780834	ST	ST	7.04375	169.05	7.04375	7.3875	1	1	1
167683	ST	ST	5.02639	120.63	5.02639	5.42917	1	1	1
421741	ST	ST	6.0375	144.9	6.0375	5.99861	1	1	1
617803	ST	ST	5.05556	121.33	5.05556	5.47569	1	1	1
156893	ST	ST	6.31528	134.77	6.31528	7.42778	1	1	1
346537	ST	ST	14.9	14.9	14.9	14.9	0	0	0
803421	ST	ST	14.9	14.9	14.9	14.9	0	0	0
119866	ST	ST	8.04653	193.12	8.04653	14.9	1	1	0
149686	SPT	SPT	7.11458	193.12	7.11458	12.1979	1	1	1
884987	SPT	SPT	14.9	14.9	14.9	14.9	0	0	0
540809	SPT	SPT	14.9	14.9	14.9	14.9	0	0	0
354813	SPT	SPT	11.9875	287.7	11.9875	11.9875	1	1	0
217532	SPT	SPT	14.9	14.9	13.9083	14.9	0	0	0
62458	SPT	SPT	5.95208	166.78	5.95208	14.9	1	1	0
79390	SPT	SPT	4.26597	102.37	4.26597	14.9	1	1	0
576482	SPT	SPT	5.11667	122.8	5.11667	8.50556	1	1	1
510746	SPT	SPT	6.21181	128.33	6.21181	5.34722	1	1	1
864132	SPT	SPT	10.9764	263.43	10.9764	11.5736	1	1	1
28093	SPT	SPT	5.02917	120.7	5.02917	7.43889	1	1	1
944513	SPT	SPT	14.9	14.9	14.9	14.9	0	0	0
950044	SPT	SPT	12.0938	290.25	12.0938	14.9	1	1	0
506819	SPT	SPT	6.50486	167.53	6.50486	6.50486	1	0	1
373878	SPT	SPT	14.9	14.9	14.9	14.9	0	0	0
283680	SPT	SPT	5	5	5	5	0	0	0
841895	SPT	SPT	14.9	14.9	14.9	14.9	0	0	0
511592	SPT	SPT	14.9	14.9	14.9	14.9	0	0	0
201699	SPT	SPT	14.9	14.9	14.9	14.9	0	0	0
374590	ST_ST	ST	10.3215	247.72	14.9	9.38403	1	0	1
343160	ST_ST	ST	6.12222	146.93	6.12222	6.12222	1	1	0
643527	ST_ST	ST	14.9	14.9	14.9	14.9	0	0	0
345908	ST_ST	ST	14.9	14.9	14.9	14.9	0	0	0
824531	ST_ST	ST	14.9	14.9	14.9	14.9	0	0	0
705367	ST_ST	ST	14.9	14.9	14.9	14.9	0	0	0
411168	ST_ST	ST	14.9	14.9	14.9	14.9	0	0	0
957290	ST_ST	ST	7.99653	191.92	7.99653	11.3542	1	1	1
563441	ST_ST	ST	14.9	14.9	14.9	14.9	0	0	0
608500	ST_ST	ST	8.95347	214.88	8.95347	8.95347	1	1	0
322814	ST_ST	ST	7.99375	191.85	7.99375	14.9	1	1	0
461958	ST_ST	ST	14.9	14.9	14.9	14.9	0	0	0
224442	ST_ST	ST	9.95556	238.93	9.95556	9.39653	1	1	1
551414	ST_ST	ST	8.11667	194.8	8.11667	7.46042	1	1	1
398130	ST_ST	ST	5.15069	123.62	5.15069	7.16667	1	1	1
219730	ST_ST	ST	7.06944	169.67	7.06944	7.06944	1	1	0
426833	ST_ST	ST	14.9	14.9	14.9	14.9	0	0	0
593933	ST_ST	ST	14.9	14.9	14.9	14.9	0	0	0
292911	ST_ST	ST	14.9	14.9	14.9	14.9	0	0	0
622236	ST_ST	ST	14.9	14.9	14.9	14.9	0	0	0
939342	ST_ST	ST	8.04167	193	8.04167	8.04167	1	1	1
531642	ST_ST	ST	14.9	14.9	14.9	14.9	0	0	0
54757	ST_ST	ST	4.02083	96.5	4.02083	5.46875	1	1	1
449902	ST_ST	ST	14.9	14.9	14.9	12.9993	0	0	1
961488	ST_ST	ST	14.9	14.9	14.9	14.9	0	0	0
386801	ST_ST	ST	10.9132	261.92	10.9132	11.4653	1	1	1
193931	ST_ST	ST	14.9	14.9	14.9	14.9	0	0	0
519331	ST_SPT	SPT	14.2111	251.83	14.2111	10.4931	1	1	1
568385	ST_SPT	SPT	8.08681	194.08	8.08681	8.08681	1	1	0
35004	ST_SPT	SPT	11.1083	266.6	11.1083	11.1083	1	1	0
870718	ST_SPT	SPT	14.9	14.9	14.9	14.9	0	0	0
452662	ST_SPT	SPT	11.0431	265.03	11.0431	14.491	1	1	1
635003	ST_SPT	SPT	14.9	14.9	14.9	14.9	0	0	0
211566	ST_SPT	SPT	14.9	14.9	14.9	14.9	0	0	0
263323	ST_SPT	SPT	14.9	14.9	14.9	14.9	0	0	0
287682	ST_SPT	SPT	11.0306	264.73	11.0306	11.0306	1	1	0
312875	ST_SPT	SPT	14.9	14.9	14.9	14.9	0	0	0
413508	ST_SPT	SPT	6.97153	167.32	6.97153	9.47153	1	1	1
137293	ST_SPT	SPT	14.9	14.9	14.9	14.9	0	0	0
838375	ST_SPT	SPT	14.9	14.9	14.9	14.9	0	0	0
878052	ST_SPT	SPT	6.95556	166.93	6.95556	9.49583	1	1	1
71197	ST_SPT	SPT	8.04167	193	8.04167	8.04167	1	1	0
612550	ST_SPT	SPT	14.9	14.9	14.9	14.9	0	0	0
214145	ST_SPT	SPT	14.9	14.9	14.9	14.9	0	0	0
669481	ST_SPT	SPT	14.9	14.9	14.9	14.9	0	0	0
193587	ST_SPT	SPT	5.08125	121.95	5.08125	5.75833	1	1	1
759371	ST_SPT	SPT	5.91528	141.97	5.91528	8.34931	1	1	1
121011	ST_SPT	SPT	7.21736	173.22	7.21736	7.21736	1	1	0
941844	ST_SPT	SPT	5.14028	123.37	5.14028	8.94583	1	1	1
727024	ST_SPT	SPT	14.9	14.9	14.9	14.9	0	0	0
272439	ST_SPT	SPT	14.9	14.9	14.9	14.9	0	0	0
511473	ST_SPT	SPT	14.9	14.9	14.9	14.9	0	0	0
594809	ST_SPT	SPT	7.96875	191.25	7.96875	9.44097	1	1	1
838740	SPT_ST	ST	14.9	14.9	14.9	14.9	0	0	0
619895	SPT_ST	ST	4.04514	97.08	4.04514	6.39236	1	1	1
463272	SPT_ST	ST	6.96736	167.22	6.96736	6.96736	1	1	0
272696	SPT_ST	ST	8.92292	214.15	8.92292	8.92292	1	1	0
102531	SPT_ST	ST	4.96875	119.25	4.96875	5.98611	1	1	1
491725	SPT_ST	ST	7.96944	191.27	7.96944	7.96944	1	1	0
617557	SPT_ST	ST	6.05417	145.3	6.05417	6.05417	1	1	0
338443	SPT_ST	ST	14.9	14.9	14.9	14.9	0	0	0
940365	SPT_ST	ST	8.91458	213.95	8.91458	10.1333	1	1	1
959671	SPT_ST	ST	14.9	14.9	14.9	14.9	0	0	0
282979	SPT_SPT	SPT	14.9	14.9	14.9	14.9	0	0	0
161530	SPT_SPT	SPT	9.99375	226.52	9.99375	9.43819	1	1	1
729541	SPT_SPT	SPT	14.9	14.9	14.9	14.9	0	0	0
812521	SPT_SPT	SPT	14.9	14.9	14.9	14.9	0	0	0
129895	SPT_SPT	SPT	14.9	14.9	14.9	14.9	0	0	0
45185	SPT_SPT	SPT	8.14444	10	8.14444	8.14444	0	1	0
905144	SPT_SPT	SPT	14.9	14.9	14.9	14.9	0	0	0
232937	SPT_SPT	SPT	14.9	14.9	14.9	14.9	0	0	0
886147	SPT_SPT	SPT	14.9	14.9	14.9	14.9	0	0	0
855549	SPT_SPT	SPT	14.9	14.9	14.9	14.9	0	0	0
203919	SPT_SPT	SPT	14.9	14.9	14.9	14.9	0	0	0
97826	SPT_SPT	SPT	10.9736	263.37	10.9736	10.9736	1	1	0
384764	SPT_SPT	SPT	5.95556	142.93	5.95556	5.95556	1	1	0

## Sheet: Ab
LabID	Timepoint	Value	Log10_Value	FC	Log_FC	Antigen	Isotype	Antigen_Ab	Units	Serovar	Group	Diagnosis	Interval	Previous_Diagnosis
8206	Day 28	97.25	1.98789	0.90803	-0.0418999	O9:LPS	IgA	O9:LPS_IgA	EU	ST	SPT-ST	ED	13.9	1
8330	Day 28	241.65	2.38319	NA	NA	O9:LPS	IgA	O9:LPS_IgA	EU	ST	ST	ED	NA	NA
8370	Day 0	52.85	1.72304	1	0	O9:LPS	IgA	O9:LPS_IgA	EU	ST	SPT-ST	ED	15.9	1
8370	Day 28	250.05	2.39803	4.73132	0.674982	O9:LPS	IgA	O9:LPS_IgA	EU	ST	SPT-ST	ED	15.9	1
8373	Day 0	125.6	2.09899	1	0	O9:LPS	IgA	O9:LPS_IgA	EU	ST	SPT-ST	ED	24.9	1
8373	Day 28	516.6	2.71315	4.11306	0.614165	O9:LPS	IgA	O9:LPS_IgA	EU	ST	SPT-ST	ED	24.9	1
8506	Day 0	58.8	1.76938	1	0	O9:LPS	IgA	O9:LPS_IgA	EU	ST	ST	nED	NA	NA
8506	Day 90	131	2.11727	2.22789	0.347894	O9:LPS	IgA	O9:LPS_IgA	EU	ST	ST	nED	NA	NA
8518	Day 0	82.2	1.91487	1	0	O9:LPS	IgA	O9:LPS_IgA	EU	ST	ST-ST	nED	42.9	1
8518	Day 28	84.2	1.92531	1.02433	0.0104403	O9:LPS	IgA	O9:LPS_IgA	EU	ST	ST-ST	nED	42.9	1
8518	Day 90	81.7	1.91222	NA	NA	O9:LPS	IgA	O9:LPS_IgA	EU	ST	ST-ST	nED	42.9	1
8553	Day 28	476.7	2.67825	NA	NA	O9:LPS	IgA	O9:LPS_IgA	EU	ST	ST-ST	nED	41.4	0
8555	Day 28	721.8	2.85842	NA	NA	O9:LPS	IgA	O9:LPS_IgA	EU	ST	ST	ED	NA	NA
8555	Day 90	94.7	1.97635	NA	NA	O9:LPS	IgA	O9:LPS_IgA	EU	ST	ST	ED	NA	NA
8616	Day 28	101	2.00432	NA	NA	O9:LPS	IgA	O9:LPS_IgA	EU	ST	ST	ED	NA	NA
8679	Day 0	101.5	2.00647	1	0	O9:LPS	IgA	O9:LPS_IgA	EU	ST	ST-ST	ED	45.8	0
8679	Day 28	253.8	2.40449	2.50049	0.398026	O9:LPS	IgA	O9:LPS_IgA	EU	ST	ST-ST	ED	45.8	0
8679	Day 90	96.4	1.98408	0.949754	-0.022389	O9:LPS	IgA	O9:LPS_IgA	EU	ST	ST-ST	ED	45.8	0
8715	Day 28	1332	3.1245	NA	NA	O9:LPS	IgA	O9:LPS_IgA	EU	ST	ST	ED	NA	NA
8761	Day 0	126.6	2.10243	1	0	O9:LPS	IgA	O9:LPS_IgA	EU	ST	SPT-ST	nED	19.1	0
8761	Day 28	90.2	1.95521	0.71248	-0.147227	O9:LPS	IgA	O9:LPS_IgA	EU	ST	SPT-ST	nED	19.1	0
8764	Day 0	112.8	2.05231	1	0	O9:LPS	IgA	O9:LPS_IgA	EU	ST	ST-ST	nED	47.8	1
8764	Day 90	515.4	2.71214	4.56915	0.659835	O9:LPS	IgA	O9:LPS_IgA	EU	ST	ST-ST	nED	47.8	1
8770	Day 28	1453.5	3.16242	NA	NA	O9:LPS	IgA	O9:LPS_IgA	EU	ST	ST-ST	ED	57.5	1
8770	Day 90	525.6	2.72066	NA	NA	O9:LPS	IgA	O9:LPS_IgA	EU	ST	ST-ST	ED	57.5	1
8803	Day 0	83.2	1.92012	1	0	O9:LPS	IgA	O9:LPS_IgA	EU	ST	ST	nED	NA	NA
8803	Day 28	87.2	1.94052	1.04808	0.0203932	O9:LPS	IgA	O9:LPS_IgA	EU	ST	ST	nED	NA	NA
8803	Day 90	104.9	2.02078	1.26082	0.100652	O9:LPS	IgA	O9:LPS_IgA	EU	ST	ST	nED	NA	NA
8851	Day 90	84.6	1.92737	NA	NA	O9:LPS	IgA	O9:LPS_IgA	EU	ST	SPT-ST	ED	15.9	0
8904	Day 28	1092.6	3.03846	NA	NA	O9:LPS	IgA	O9:LPS_IgA	EU	ST	ST-ST	ED	38.7	0
8904	Day 90	359.4	2.55558	NA	NA	O9:LPS	IgA	O9:LPS_IgA	EU	ST	ST-ST	ED	38.7	0
8018	Day 0	343.8	2.53631	1	0	Hd	IgG	Hd_IgG	EU	ST	ST	ED	NA	NA
8018	Day 28	449.1	2.65234	1.30628	0.116037	Hd	IgG	Hd_IgG	EU	ST	ST	ED	NA	NA
8018	Day 90	422.1	2.62542	1.22775	0.0891095	Hd	IgG	Hd_IgG	EU	ST	ST	ED	NA	NA
8025	Day 0	150.7	2.17811	1	0	Hd	IgG	Hd_IgG	EU	ST	ST-ST	ED	60.6	1
8025	Day 28	248.7	2.39568	1.6503	0.217563	Hd	IgG	Hd_IgG	EU	ST	ST-ST	ED	60.6	1
8025	Day 90	188.55	2.27543	1.25116	0.0973133	Hd	IgG	Hd_IgG	EU	ST	ST-ST	ED	60.6	1
8097	Day 28	240.45	2.38102	NA	NA	Hd	IgG	Hd_IgG	EU	ST	ST-ST	nED	42.5	1
8097	Day 90	502.2	2.70088	NA	NA	Hd	IgG	Hd_IgG	EU	ST	ST-ST	nED	42.5	1
8206	Day 28	1261.8	3.10099	NA	NA	Hd	IgG	Hd_IgG	EU	ST	SPT-ST	ED	13.9	1
8206	Day 90	1284.3	3.10867	NA	NA	Hd	IgG	Hd_IgG	EU	ST	SPT-ST	ED	13.9	1
8235	Day 0	110.55	2.04356	1	0	Hd	IgG	Hd_IgG	EU	ST	ST	ED	NA	NA
8235	Day 28	132.15	2.12107	1.19539	0.0775084	Hd	IgG	Hd_IgG	EU	ST	ST	ED	NA	NA
8268	Day 0	197.85	2.29634	1	0	Hd	IgG	Hd_IgG	EU	ST	SPT-ST	ED	24.1	1
8268	Day 28	192.45	2.28432	0.972707	-0.0120181	Hd	IgG	Hd_IgG	EU	ST	SPT-ST	ED	24.1	1
8298	Day 0	96.45	1.9843	1	0	Hd	IgG	Hd_IgG	EU	ST	SPT-ST	ED	15.1	1
8298	Day 28	84.85	1.92865	0.87973	-0.0556504	Hd	IgG	Hd_IgG	EU	ST	SPT-ST	ED	15.1	1
8330	Day 0	129.5	2.11227	1	0	Hd	IgG	Hd_IgG	EU	ST	ST	ED	NA	NA
8330	Day 28	162.4	2.21059	1.25405	0.0983163	Hd	IgG	Hd_IgG	EU	ST	ST	ED	NA	NA
8330	Day 90	158.3	2.19948	1.22239	0.0872111	Hd	IgG	Hd_IgG	EU	ST	ST	ED	NA	NA
8370	Day 0	160.3	2.20493	1	0	Hd	IgG	Hd_IgG	EU	ST	SPT-ST	ED	15.9	1
8370	Day 28	198	2.29667	1.23518	0.0917317	Hd	IgG	Hd_IgG	EU	ST	SPT-ST	ED	15.9	1
8370	Day 90	177.9	2.25018	1.10979	0.0452424	Hd	IgG	Hd_IgG	EU	ST	SPT-ST	ED	15.9	1
8373	Day 0	124	2.09342	1	0	Hd	IgG	Hd_IgG	EU	ST	SPT-ST	ED	24.9	1
8373	Day 28	157.2	2.19645	1.26774	0.103031	Hd	IgG	Hd_IgG	EU	ST	SPT-ST	ED	24.9	1
8373	Day 90	129.9	2.11361	1.04758	0.0201875	Hd	IgG	Hd_IgG	EU	ST	SPT-ST	ED	24.9	1
8415	Day 0	132.3	2.12156	1	0	Hd	IgG	Hd_IgG	EU	ST	ST	nED	NA	NA
8415	Day 28	96.3	1.98363	0.727891	-0.137934	Hd	IgG	Hd_IgG	EU	ST	ST	nED	NA	NA
8415	Day 90	230.4	2.36248	1.7415	0.240923	Hd	IgG	Hd_IgG	EU	ST	ST	nED	NA	NA
8421	Day 0	250.8	2.39933	1	0	Hd	IgG	Hd_IgG	EU	ST	ST-ST	ED	53	1
8485	Day 0	169.3	2.22866	1	0	Hd	IgG	Hd_IgG	EU	ST	ST-ST	ED	41.4	1
8485	Day 28	929.7	2.96834	5.49144	0.739686	Hd	IgG	Hd_IgG	EU	ST	ST-ST	ED	41.4	1
8485	Day 90	350.1	2.54419	2.06793	0.315535	Hd	IgG	Hd_IgG	EU	ST	ST-ST	ED	41.4	1
8518	Day 0	312	2.49415	1	0	Hd	IgG	Hd_IgG	EU	ST	ST-ST	nED	42.9	1
8531	Day 0	157.5	2.19728	1	0	Hd	IgG	Hd_IgG	EU	ST	ST-ST	ED	15.8	0
8531	Day 28	197.4	2.29535	1.25333	0.0980666	Hd	IgG	Hd_IgG	EU	ST	ST-ST	ED	15.8	0
8531	Day 90	185.6	2.26858	1.17841	0.0712974	Hd	IgG	Hd_IgG	EU	ST	ST-ST	ED	15.8	0
8553	Day 0	385.5	2.58602	1	0	Hd	IgG	Hd_IgG	EU	ST	ST-ST	nED	41.4	0
8553	Day 28	399.6	2.60163	1.03658	0.0156011	Hd	IgG	Hd_IgG	EU	ST	ST-ST	nED	41.4	0
8553	Day 90	363.6	2.56062	0.943191	-0.0254005	Hd	IgG	Hd_IgG	EU	ST	ST-ST	nED	41.4	0
8555	Day 0	912.6	2.96028	1	0	Hd	IgG	Hd_IgG	EU	ST	ST	ED	NA	NA
8555	Day 28	842.4	2.92552	0.923077	-0.0347621	Hd	IgG	Hd_IgG	EU	ST	ST	ED	NA	NA
8555	Day 90	162.7	2.21139	0.178282	-0.748893	Hd	IgG	Hd_IgG	EU	ST	ST	ED	NA	NA
8557	Day 28	545.4	2.73672	NA	NA	Hd	IgG	Hd_IgG	EU	ST	SPT-ST	nED	24.5	0
8557	Day 90	183.45	2.26352	NA	NA	Hd	IgG	Hd_IgG	EU	ST	SPT-ST	nED	24.5	0
8599	Day 0	92.55	1.96638	1	0	Hd	IgG	Hd_IgG	EU	ST	ST	ED	NA	NA
8599	Day 28	159.3	2.20222	1.72123	0.235839	Hd	IgG	Hd_IgG	EU	ST	ST	ED	NA	NA
8616	Day 0	254.1	2.405	1	0	Hd	IgG	Hd_IgG	EU	ST	ST	ED	NA	NA
8616	Day 28	232	2.36549	0.913026	-0.0395167	Hd	IgG	Hd_IgG	EU	ST	ST	ED	NA	NA
8616	Day 90	253.5	2.40398	0.997639	-0.0010267	Hd	IgG	Hd_IgG	EU	ST	ST	ED	NA	NA
8649	Day 0	145.1	2.16167	1	0	Hd	IgG	Hd_IgG	EU	ST	ST	ED	NA	NA
8649	Day 28	131.8	2.11992	0.908339	-0.041752	Hd	IgG	Hd_IgG	EU	ST	ST	ED	NA	NA
8649	Day 90	107.4	2.031	0.740179	-0.130663	Hd	IgG	Hd_IgG	EU	ST	ST	ED	NA	NA
8673	Day 0	73.2	1.86451	1	0	Hd	IgG	Hd_IgG	EU	ST	ST-ST	ED	21.8	1
8673	Day 28	96.2	1.98318	1.31421	0.118664	Hd	IgG	Hd_IgG	EU	ST	ST-ST	ED	21.8	1
8679	Day 0	94.7	1.97635	1	0	Hd	IgG	Hd_IgG	EU	ST	ST-ST	ED	45.8	0
8679	Day 28	132.8	2.1232	1.40232	0.146848	Hd	IgG	Hd_IgG	EU	ST	ST-ST	ED	45.8	0
8679	Day 90	67.5	1.8293	0.712777	-0.147046	Hd	IgG	Hd_IgG	EU	ST	ST-ST	ED	45.8	0
8694	Day 28	190.2	2.27921	NA	NA	Hd	IgG	Hd_IgG	EU	ST	ST	ED	NA	NA
8694	Day 90	156.9	2.19562	NA	NA	Hd	IgG	Hd_IgG	EU	ST	ST	ED	NA	NA
8697	Day 0	293.4	2.46746	1	0	Hd	IgG	Hd_IgG	EU	ST	ST-ST	ED	44.7	0
8697	Day 28	225.9	2.35392	0.769939	-0.113544	Hd	IgG	Hd_IgG	EU	ST	ST-ST	ED	44.7	0
8697	Day 90	141	2.14922	0.480573	-0.318241	Hd	IgG	Hd_IgG	EU	ST	ST-ST	ED	44.7	0
8708	Day 0	178.9	2.25261	1	0	Hd	IgG	Hd_IgG	EU	ST	ST-ST	nED	16.8	0
8708	Day 28	201	2.3032	1.12353	0.0505857	Hd	IgG	Hd_IgG	EU	ST	ST-ST	nED	16.8	0
8708	Day 90	177.4	2.24895	0.991615	-0.00365672	Hd	IgG	Hd_IgG	EU	ST	ST-ST	nED	16.8	0
8713	Day 28	199.65	2.30027	NA	NA	Hd	IgG	Hd_IgG	EU	ST	ST	ED	NA	NA
8713	Day 90	225	2.35218	NA	NA	Hd	IgG	Hd_IgG	EU	ST	ST	ED	NA	NA
8761	Day 0	89.1	1.94988	1	0	Hd	IgG	Hd_IgG	EU	ST	SPT-ST	nED	19.1	0
8761	Day 28	70.2	1.84634	0.787879	-0.103541	Hd	IgG	Hd_IgG	EU	ST	SPT-ST	nED	19.1	0
8803	Day 0	185.4	2.26811	1	0	Hd	IgG	Hd_IgG	EU	ST	ST	nED	NA	NA
8803	Day 28	129.4	2.11193	0.69795	-0.156175	Hd	IgG	Hd_IgG	EU	ST	ST	nED	NA	NA
8803	Day 90	120.3	2.08027	0.648867	-0.187844	Hd	IgG	Hd_IgG	EU	ST	ST	nED	NA	NA
8836	Day 0	101.6	2.00689	1	0	Hd	IgG	Hd_IgG	EU	ST	ST-ST	nED	14.7	0
8836	Day 90	108.5	2.03543	1.06791	0.028536	Hd	IgG	Hd_IgG	EU	ST	ST-ST	nED	14.7	0
8851	Day 0	140.8	2.1486	1	0	Hd	IgG	Hd_IgG	EU	ST	SPT-ST	ED	15.9	0
8851	Day 28	134.1	2.12743	0.952415	-0.0211739	Hd	IgG	Hd_IgG	EU	ST	SPT-ST	ED	15.9	0
8851	Day 90	905.4	2.95684	6.4304	0.808238	Hd	IgG	Hd_IgG	EU	ST	SPT-ST	ED	15.9	0
8858	Day 0	171.6	2.23452	1	0	Hd	IgG	Hd_IgG	EU	ST	ST-ST	nED	39.5	0
8858	Day 28	167.2	2.22324	0.974359	-0.011281	Hd	IgG	Hd_IgG	EU	ST	ST-ST	nED	39.5	0
8871	Day 0	175.4	2.24403	1	0	Hd	IgG	Hd_IgG	EU	ST	ST-ST	nED	38	0
8871	Day 28	149.1	2.17348	0.850057	-0.0705519	Hd	IgG	Hd_IgG	EU	ST	ST-ST	nED	38	0
8904	Day 90	108.7	2.03623	0.619726	-0.2078	Hd	IgG	Hd_IgG	EU	ST	ST-ST	ED	38.7	0
8928	Day 0	1229.4	3.08969	1	0	Hd	IgG	Hd_IgG	EU	ST	ST-ST	ED	37.9	1
8928	Day 28	1164.6	3.06618	0.947291	-0.0235164	Hd	IgG	Hd_IgG	EU	ST	ST-ST	ED	37.9	1
8929	Day 0	72.5	1.86034	1	0	Hd	IgG	Hd_IgG	EU	ST	ST	nED	NA	NA
8929	Day 28	76	1.88081	1.04828	0.0204756	Hd	IgG	Hd_IgG	EU	ST	ST	nED	NA	NA
8929	Day 90	63.9	1.8055	0.881379	-0.0548371	Hd	IgG	Hd_IgG	EU	ST	ST	nED	NA	NA
8954	Day 0	159.6	2.20303	1	0	Hd	IgG	Hd_IgG	EU	ST	ST	nED	NA	NA
8954	Day 28	165.9	2.21985	1.03947	0.0168135	Hd	IgG	Hd_IgG	EU	ST	ST	nED	NA	NA
8005	Day 0	3.7	0.568202	1	0	Vi	IgG	Vi_IgG	EU	ST	SPT-ST	nED	15.8	1
8005	Day 28	3.7	0.568202	1	0	Vi	IgG	Vi_IgG	EU	ST	SPT-ST	nED	15.8	1
8005	Day 90	9.114	0.959709	2.46324	0.391507	Vi	IgG	Vi_IgG	EU	ST	SPT-ST	nED	15.8	1
8018	Day 0	7.675	0.885078	1	0	Vi	IgG	Vi_IgG	EU	ST	ST	ED	NA	NA
8018	Day 28	3.7	0.568202	0.482085	-0.316877	Vi	IgG	Vi_IgG	EU	ST	ST	ED	NA	NA
8018	Day 90	7.449	0.872098	0.970554	-0.0129804	Vi	IgG	Vi_IgG	EU	ST	ST	ED	NA	NA
8025	Day 0	3.7	0.568202	1	0	Vi	IgG	Vi_IgG	EU	ST	ST-ST	ED	60.6	1
8025	Day 28	3.7	0.568202	1	0	Vi	IgG	Vi_IgG	EU	ST	ST-ST	ED	60.6	1
8025	Day 90	3.7	0.568202	1	0	Vi	IgG	Vi_IgG	EU	ST	ST-ST	ED	60.6	1
8097	Day 0	3.7	0.568202	1	0	Vi	IgG	Vi_IgG	EU	ST	ST-ST	nED	42.5	1
8097	Day 28	3.7	0.568202	1	0	Vi	IgG	Vi_IgG	EU	ST	ST-ST	nED	42.5	1
8097	Day 90	3.7	0.568202	1	0	Vi	IgG	Vi_IgG	EU	ST	ST-ST	nED	42.5	1
8206	Day 0	3.7	0.568202	1	0	Vi	IgG	Vi_IgG	EU	ST	SPT-ST	ED	13.9	1
8206	Day 28	3.7	0.568202	1	0	Vi	IgG	Vi_IgG	EU	ST	SPT-ST	ED	13.9	1
8206	Day 90	3.7	0.568202	1	0	Vi	IgG	Vi_IgG	EU	ST	SPT-ST	ED	13.9	1
8211	Day 0	3.7	0.568202	1	0	Vi	IgG	Vi_IgG	EU	ST	SPT-ST	ED	18.8	1
8211	Day 28	3.7	0.568202	1	0	Vi	IgG	Vi_IgG	EU	ST	SPT-ST	ED	18.8	1
8211	Day 90	3.7	0.568202	1	0	Vi	IgG	Vi_IgG	EU	ST	SPT-ST	ED	18.8	1
8268	Day 0	58.431	1.76664	1	0	Vi	IgG	Vi_IgG	EU	ST	SPT-ST	ED	24.1	1
8268	Day 28	51.466	1.71152	0.8808	-0.0551229	Vi	IgG	Vi_IgG	EU	ST	SPT-ST	ED	24.1	1
8330	Day 0	3.7	0.568202	1	0	Vi	IgG	Vi_IgG	EU	ST	ST	ED	NA	NA
8330	Day 28	55.579	1.74491	15.0214	1.17671	Vi	IgG	Vi_IgG	EU	ST	ST	ED	NA	NA
8330	Day 90	7.675	0.885078	2.07432	0.316877	Vi	IgG	Vi_IgG	EU	ST	ST	ED	NA	NA
8370	Day 0	28.938	1.46147	1	0	Vi	IgG	Vi_IgG	EU	ST	SPT-ST	ED	15.9	1
8370	Day 28	31.05	1.49206	1.07298	0.0305931	Vi	IgG	Vi_IgG	EU	ST	SPT-ST	ED	15.9	1
8370	Day 90	28.351	1.45257	0.979715	-0.00890013	Vi	IgG	Vi_IgG	EU	ST	SPT-ST	ED	15.9	1
8373	Day 0	16.982	1.22999	1	0	Vi	IgG	Vi_IgG	EU	ST	SPT-ST	ED	24.9	1
8373	Day 28	18.867	1.2757	1.111	0.045714	Vi	IgG	Vi_IgG	EU	ST	SPT-ST	ED	24.9	1
8373	Day 90	17.218	1.23598	1.0139	0.00599387	Vi	IgG	Vi_IgG	EU	ST	SPT-ST	ED	24.9	1
8415	Day 0	3.7	0.568202	1	0	Vi	IgG	Vi_IgG	EU	ST	ST	nED	NA	NA
8415	Day 28	3.7	0.568202	1	0	Vi	IgG	Vi_IgG	EU	ST	ST	nED	NA	NA
8415	Day 90	3.7	0.568202	1	0	Vi	IgG	Vi_IgG	EU	ST	ST	nED	NA	NA
8421	Day 0	3.7	0.568202	1	0	Vi	IgG	Vi_IgG	EU	ST	ST-ST	ED	53	1
8421	Day 28	7.675	0.885078	2.07432	0.316877	Vi	IgG	Vi_IgG	EU	ST	ST-ST	ED	53	1
8421	Day 90	27.55	1.44012	7.44595	0.87192	Vi	IgG	Vi_IgG	EU	ST	ST-ST	ED	53	1
8485	Day 0	3.7	0.568202	1	0	Vi	IgG	Vi_IgG	EU	ST	ST-ST	ED	41.4	1
8485	Day 28	3.7	0.568202	1	0	Vi	IgG	Vi_IgG	EU	ST	ST-ST	ED	41.4	1
8485	Day 90	3.7	0.568202	1	0	Vi	IgG	Vi_IgG	EU	ST	ST-ST	ED	41.4	1
8506	Day 0	26.876	1.42936	1	0	Vi	IgG	Vi_IgG	EU	ST	ST	nED	NA	NA
8506	Day 28	26.461	1.42261	0.984559	-0.00675838	Vi	IgG	Vi_IgG	EU	ST	ST	nED	NA	NA
8518	Day 0	3.7	0.568202	1	0	Vi	IgG	Vi_IgG	EU	ST	ST-ST	nED	42.9	1
8518	Day 28	3.7	0.568202	1	0	Vi	IgG	Vi_IgG	EU	ST	ST-ST	nED	42.9	1
8518	Day 90	3.7	0.568202	1	0	Vi	IgG	Vi_IgG	EU	ST	ST-ST	nED	42.9	1
8553	Day 0	3.7	0.568202	1	0	Vi	IgG	Vi_IgG	EU	ST	ST-ST	nED	41.4	0
8553	Day 28	21.857	1.33959	5.9073	0.771389	Vi	IgG	Vi_IgG	EU	ST	ST-ST	nED	41.4	0
8553	Day 90	8.307	0.919444	2.24514	0.351242	Vi	IgG	Vi_IgG	EU	ST	ST-ST	nED	41.4	0
8555	Day 0	3.7	0.568202	1	0	Vi	IgG	Vi_IgG	EU	ST	ST	ED	NA	NA
8555	Day 28	3.7	0.568202	1	0	Vi	IgG	Vi_IgG	EU	ST	ST	ED	NA	NA
8555	Day 90	3.7	0.568202	1	0	Vi	IgG	Vi_IgG	EU	ST	ST	ED	NA	NA
8557	Day 0	3.7	0.568202	1	0	Vi	IgG	Vi_IgG	EU	ST	SPT-ST	nED	24.5	0
8557	Day 28	3.7	0.568202	1	0	Vi	IgG	Vi_IgG	EU	ST	SPT-ST	nED	24.5	0
8557	Day 90	3.7	0.568202	1	0	Vi	IgG	Vi_IgG	EU	ST	SPT-ST	nED	24.5	0
8616	Day 0	15.018	1.17661	1	0	Vi	IgG	Vi_IgG	EU	ST	ST	ED	NA	NA
8616	Day 28	12.93	1.1116	0.860967	-0.0650136	Vi	IgG	Vi_IgG	EU	ST	ST	ED	NA	NA
8616	Day 90	12.414	1.09391	0.826608	-0.0827004	Vi	IgG	Vi_IgG	EU	ST	ST	ED	NA	NA
8649	Day 0	58.431	1.76664	1	0	Vi	IgG	Vi_IgG	EU	ST	ST	ED	NA	NA
8649	Day 28	51.466	1.71152	0.8808	-0.0551229	Vi	IgG	Vi_IgG	EU	ST	ST	ED	NA	NA
8649	Day 90	55.579	1.74491	0.95119	-0.0217326	Vi	IgG	Vi_IgG	EU	ST	ST	ED	NA	NA
8679	Day 0	3.7	0.568202	1	0	Vi	IgG	Vi_IgG	EU	ST	ST-ST	ED	45.8	0
8679	Day 28	3.7	0.568202	1	0	Vi	IgG	Vi_IgG	EU	ST	ST-ST	ED	45.8	0
8679	Day 90	3.7	0.568202	1	0	Vi	IgG	Vi_IgG	EU	ST	ST-ST	ED	45.8	0
8685	Day 0	3.7	0.568202	1	0	Vi	IgG	Vi_IgG	EU	ST	ST-ST	nED	44.8	0
8685	Day 28	15.018	1.17661	4.05892	0.60841	Vi	IgG	Vi_IgG	EU	ST	ST-ST	nED	44.8	0
8685	Day 90	12.93	1.1116	3.49459	0.543397	Vi	IgG	Vi_IgG	EU	ST	ST-ST	nED	44.8	0
8694	Day 0	12.414	1.09391	1	0	Vi	IgG	Vi_IgG	EU	ST	ST	ED	NA	NA
8694	Day 28	3.7	0.568202	0.298051	-0.52571	Vi	IgG	Vi_IgG	EU	ST	ST	ED	NA	NA
8694	Day 90	3.7	0.568202	0.298051	-0.52571	Vi	IgG	Vi_IgG	EU	ST	ST	ED	NA	NA
8697	Day 0	3.7	0.568202	1	0	Vi	IgG	Vi_IgG	EU	ST	ST-ST	ED	44.7	0
8697	Day 28	3.7	0.568202	1	0	Vi	IgG	Vi_IgG	EU	ST	ST-ST	ED	44.7	0
8697	Day 90	3.7	0.568202	1	0	Vi	IgG	Vi_IgG	EU	ST	ST-ST	ED	44.7	0
8713	Day 0	27.554	1.44018	1	0	Vi	IgG	Vi_IgG	EU	ST	ST	ED	NA	NA
8713	Day 28	26.876	1.42936	0.975394	-0.01082	Vi	IgG	Vi_IgG	EU	ST	ST	ED	NA	NA
8713	Day 90	26.461	1.42261	0.960332	-0.0175784	Vi	IgG	Vi_IgG	EU	ST	ST	ED	NA	NA
8761	Day 0	3.7	0.568202	1	0	Vi	IgG	Vi_IgG	EU	ST	SPT-ST	nED	19.1	0
8761	Day 28	3.7	0.568202	1	0	Vi	IgG	Vi_IgG	EU	ST	SPT-ST	nED	19.1	0
8761	Day 90	3.7	0.568202	1	0	Vi	IgG	Vi_IgG	EU	ST	SPT-ST	nED	19.1	0
8764	Day 0	3.7	0.568202	1	0	Vi	IgG	Vi_IgG	EU	ST	ST-ST	nED	47.8	1
8764	Day 28	396.468	2.59821	107.154	2.03001	Vi	IgG	Vi_IgG	EU	ST	ST-ST	nED	47.8	1
8764	Day 90	448.24	2.65151	121.146	2.08331	Vi	IgG	Vi_IgG	EU	ST	ST-ST	nED	47.8	1
8770	Day 0	409.564	2.61232	1	0	Vi	IgG	Vi_IgG	EU	ST	ST-ST	ED	57.5	1
8770	Day 28	3.7	0.568202	0.009034	-2.04412	Vi	IgG	Vi_IgG	EU	ST	ST-ST	ED	57.5	1
8770	Day 90	3.7	0.568202	0.009034	-2.04412	Vi	IgG	Vi_IgG	EU	ST	ST-ST	ED	57.5	1
8803	Day 0	396.468	2.59821	1	0	Vi	IgG	Vi_IgG	EU	ST	ST	nED	NA	NA
8803	Day 28	448.24	2.65151	1.13058	0.0533025	Vi	IgG	Vi_IgG	EU	ST	ST	nED	NA	NA
8803	Day 90	409.564	2.61232	1.03303	0.0141136	Vi	IgG	Vi_IgG	EU	ST	ST	nED	NA	NA
8851	Day 0	13.301	1.12388	1	0	Vi	IgG	Vi_IgG	EU	ST	SPT-ST	ED	15.9	0
8851	Day 28	8.989	0.953711	0.675814	-0.170173	Vi	IgG	Vi_IgG	EU	ST	SPT-ST	ED	15.9	0
8851	Day 90	7.933	0.899437	0.596421	-0.224447	Vi	IgG	Vi_IgG	EU	ST	SPT-ST	ED	15.9	0
8858	Day 0	3.7	0.568202	1	0	Vi	IgG	Vi_IgG	EU	ST	ST-ST	nED	39.5	0
8858	Day 28	3.7	0.568202	1	0	Vi	IgG	Vi_IgG	EU	ST	ST-ST	nED	39.5	0
8858	Day 90	3.7	0.568202	1	0	Vi	IgG	Vi_IgG	EU	ST	ST-ST	nED	39.5	0
8871	Day 0	3.7	0.568202	1	0	Vi	IgG	Vi_IgG	EU	ST	ST-ST	nED	38	0
8871	Day 28	3.7	0.568202	1	0	Vi	IgG	Vi_IgG	EU	ST	ST-ST	nED	38	0
8871	Day 90	3.7	0.568202	1	0	Vi	IgG	Vi_IgG	EU	ST	ST-ST	nED	38	0
8904	Day 0	3.7	0.568202	1	0	Vi	IgG	Vi_IgG	EU	ST	ST-ST	ED	38.7	0
8904	Day 28	3.7	0.568202	1	0	Vi	IgG	Vi_IgG	EU	ST	ST-ST	ED	38.7	0
8904	Day 90	3.7	0.568202	1	0	Vi	IgG	Vi_IgG	EU	ST	ST-ST	ED	38.7	0
8928	Day 0	3.7	0.568202	1	0	Vi	IgG	Vi_IgG	EU	ST	ST-ST	ED	37.9	1
8928	Day 28	3.7	0.568202	1	0	Vi	IgG	Vi_IgG	EU	ST	ST-ST	ED	37.9	1
8928	Day 90	3.7	0.568202	1	0	Vi	IgG	Vi_IgG	EU	ST	ST-ST	ED	37.9	1
8929	Day 0	3.7	0.568202	1	0	Vi	IgG	Vi_IgG	EU	ST	ST	nED	NA	NA
8929	Day 28	3.7	0.568202	1	0	Vi	IgG	Vi_IgG	EU	ST	ST	nED	NA	NA
8929	Day 90	3.7	0.568202	1	0	Vi	IgG	Vi_IgG	EU	ST	ST	nED	NA	NA
8005	Day 0	234.3	2.36977	1	0	O9:LPS	IgG	O9:LPS_IgG	EU	ST	SPT-ST	nED	15.8	1
8005	Day 28	240.9	2.38184	1.02817	0.0120645	O9:LPS	IgG	O9:LPS_IgG	EU	ST	SPT-ST	nED	15.8	1
8005	Day 90	230.7	2.36305	0.984635	-0.00672469	O9:LPS	IgG	O9:LPS_IgG	EU	ST	SPT-ST	nED	15.8	1
8018	Day 0	262.5	2.41913	1	0	O9:LPS	IgG	O9:LPS_IgG	EU	ST	ST	ED	NA	NA
8018	Day 28	310.2	2.49164	1.18171	0.0725125	O9:LPS	IgG	O9:LPS_IgG	EU	ST	ST	ED	NA	NA
8018	Day 90	238.5	2.37749	0.908571	-0.0416409	O9:LPS	IgG	O9:LPS_IgG	EU	ST	ST	ED	NA	NA
8025	Day 0	23.2	1.36549	1	0	O9:LPS	IgG	O9:LPS_IgG	EU	ST	ST-ST	ED	60.6	1
8025	Day 28	57.6	1.76042	2.48276	0.394934	O9:LPS	IgG	O9:LPS_IgG	EU	ST	ST-ST	ED	60.6	1
8025	Day 90	42.2	1.62531	1.81897	0.259824	O9:LPS	IgG	O9:LPS_IgG	EU	ST	ST-ST	ED	60.6	1
8059	Day 0	157.8	2.19811	1	0	O9:LPS	IgG	O9:LPS_IgG	EU	ST	ST-ST	ED	16.5	1
8059	Day 28	174	2.24055	1.10266	0.0424422	O9:LPS	IgG	O9:LPS_IgG	EU	ST	ST-ST	ED	16.5	1
8059	Day 90	134.5	2.12872	0.852345	-0.0693847	O9:LPS	IgG	O9:LPS_IgG	EU	ST	ST-ST	ED	16.5	1
8066	Day 0	134.7	2.12937	1	0	O9:LPS	IgG	O9:LPS_IgG	EU	ST	ST-ST	nED	20.6	0
8066	Day 28	369.9	2.56808	2.7461	0.438717	O9:LPS	IgG	O9:LPS_IgG	EU	ST	ST-ST	nED	20.6	0
8066	Day 90	222.6	2.34753	1.65256	0.218158	O9:LPS	IgG	O9:LPS_IgG	EU	ST	ST-ST	nED	20.6	0
8069	Day 0	245.4	2.38987	1	0	O9:LPS	IgG	O9:LPS_IgG	EU	ST	ST	nED	NA	NA
8069	Day 28	465.9	2.66829	1.89853	0.278418	O9:LPS	IgG	O9:LPS_IgG	EU	ST	ST	nED	NA	NA
8069	Day 90	454.2	2.65725	1.85086	0.267373	O9:LPS	IgG	O9:LPS_IgG	EU	ST	ST	nED	NA	NA
8097	Day 0	73.2	1.86451	1	0	O9:LPS	IgG	O9:LPS_IgG	EU	ST	ST-ST	nED	42.5	1
8097	Day 28	106	2.02531	1.44809	0.160795	O9:LPS	IgG	O9:LPS_IgG	EU	ST	ST-ST	nED	42.5	1
8097	Day 90	96.2	1.98318	1.31421	0.118664	O9:LPS	IgG	O9:LPS_IgG	EU	ST	ST-ST	nED	42.5	1
8206	Day 0	131.1	2.1176	1	0	O9:LPS	IgG	O9:LPS_IgG	EU	ST	SPT-ST	ED	13.9	1
8206	Day 28	1538.1	3.18698	11.7323	1.06938	O9:LPS	IgG	O9:LPS_IgG	EU	ST	SPT-ST	ED	13.9	1
8206	Day 90	887.4	2.94812	6.76888	0.830517	O9:LPS	IgG	O9:LPS_IgG	EU	ST	SPT-ST	ED	13.9	1
8211	Day 0	73.8	1.86806	1	0	O9:LPS	IgG	O9:LPS_IgG	EU	ST	SPT-ST	ED	18.8	1
8211	Day 90	799.2	2.90266	10.8293	1.0346	O9:LPS	IgG	O9:LPS_IgG	EU	ST	SPT-ST	ED	18.8	1
8235	Day 90	281.7	2.44979	NA	NA	O9:LPS	IgG	O9:LPS_IgG	EU	ST	ST	ED	NA	NA
8262	Day 0	33.5	1.52504	1	0	O9:LPS	IgG	O9:LPS_IgG	EU	ST	ST	ED	NA	NA
8330	Day 0	122.7	2.08884	1	0	O9:LPS	IgG	O9:LPS_IgG	EU	ST	ST	ED	NA	NA
8330	Day 28	278.7	2.44514	2.27139	0.356292	O9:LPS	IgG	O9:LPS_IgG	EU	ST	ST	ED	NA	NA
8330	Day 90	258	2.41162	2.10269	0.322775	O9:LPS	IgG	O9:LPS_IgG	EU	ST	ST	ED	NA	NA
8370	Day 0	141.3	2.15014	1	0	O9:LPS	IgG	O9:LPS_IgG	EU	ST	SPT-ST	ED	15.9	1
8370	Day 28	801.9	2.90412	5.67516	0.753978	O9:LPS	IgG	O9:LPS_IgG	EU	ST	SPT-ST	ED	15.9	1
8370	Day 90	496.2	2.69566	3.51168	0.545515	O9:LPS	IgG	O9:LPS_IgG	EU	ST	SPT-ST	ED	15.9	1
8373	Day 0	127.2	2.10449	1	0	O9:LPS	IgG	O9:LPS_IgG	EU	ST	SPT-ST	ED	24.9	1
8373	Day 28	1322.1	3.12126	10.3939	1.01678	O9:LPS	IgG	O9:LPS_IgG	EU	ST	SPT-ST	ED	24.9	1
8373	Day 90	295.2	2.47012	2.32075	0.365629	O9:LPS	IgG	O9:LPS_IgG	EU	ST	SPT-ST	ED	24.9	1
8383	Day 0	299.1	2.47582	1	0	O9:LPS	IgG	O9:LPS_IgG	EU	ST	ST	ED	NA	NA
8383	Day 28	605.1	2.78183	2.02307	0.306011	O9:LPS	IgG	O9:LPS_IgG	EU	ST	ST	ED	NA	NA
8383	Day 90	372.9	2.57159	1.24674	0.095776	O9:LPS	IgG	O9:LPS_IgG	EU	ST	ST	ED	NA	NA
8398	Day 0	367.5	2.56526	1	0	O9:LPS	IgG	O9:LPS_IgG	EU	ST	ST-ST	nED	14.2	0
8398	Day 28	309.9	2.49122	0.843265	-0.0740358	O9:LPS	IgG	O9:LPS_IgG	EU	ST	ST-ST	nED	14.2	0
8398	Day 90	340.2	2.53173	0.925714	-0.033523	O9:LPS	IgG	O9:LPS_IgG	EU	ST	ST-ST	nED	14.2	0
8401	Day 0	237.9	2.37639	1	0	O9:LPS	IgG	O9:LPS_IgG	EU	ST	ST-ST	ED	15.2	1
8401	Day 28	761.4	2.88161	3.2005	0.505218	O9:LPS	IgG	O9:LPS_IgG	EU	ST	ST-ST	ED	15.2	1
8401	Day 90	591.6	2.77203	2.48676	0.395634	O9:LPS	IgG	O9:LPS_IgG	EU	ST	ST-ST	ED	15.2	1
8408	Day 28	48.3	1.68395	NA	NA	O9:LPS	IgG	O9:LPS_IgG	EU	ST	ST	nED	NA	NA
8408	Day 90	62.3	1.79449	NA	NA	O9:LPS	IgG	O9:LPS_IgG	EU	ST	ST	nED	NA	NA
8415	Day 0	29.95	1.4764	1	0	O9:LPS	IgG	O9:LPS_IgG	EU	ST	ST	nED	NA	NA
8415	Day 28	22.9	1.35984	0.764608	-0.116561	O9:LPS	IgG	O9:LPS_IgG	EU	ST	ST	nED	NA	NA
8415	Day 90	20.5	1.31175	0.684474	-0.164643	O9:LPS	IgG	O9:LPS_IgG	EU	ST	ST	nED	NA	NA
8421	Day 0	189.9	2.27852	1	0	O9:LPS	IgG	O9:LPS_IgG	EU	ST	ST-ST	ED	53	1
8421	Day 90	819.9	2.91376	4.31754	0.635236	O9:LPS	IgG	O9:LPS_IgG	EU	ST	ST-ST	ED	53	1
8485	Day 0	289.2	2.4612	1	0	O9:LPS	IgG	O9:LPS_IgG	EU	ST	ST-ST	ED	41.4	1
8485	Day 90	1918.8	3.28303	6.63485	0.821831	O9:LPS	IgG	O9:LPS_IgG	EU	ST	ST-ST	ED	41.4	1
8506	Day 28	241.2	2.38238	NA	NA	O9:LPS	IgG	O9:LPS_IgG	EU	ST	ST	nED	NA	NA
8506	Day 90	258.6	2.41263	NA	NA	O9:LPS	IgG	O9:LPS_IgG	EU	ST	ST	nED	NA	NA
8518	Day 0	172.9	2.23779	1	0	O9:LPS	IgG	O9:LPS_IgG	EU	ST	ST-ST	nED	42.9	1
8518	Day 28	186.3	2.27021	1.0775	0.0324179	O9:LPS	IgG	O9:LPS_IgG	EU	ST	ST-ST	nED	42.9	1
8518	Day 90	171	2.233	0.989011	-0.00479888	O9:LPS	IgG	O9:LPS_IgG	EU	ST	ST-ST	nED	42.9	1
8531	Day 0	200.7	2.30255	1	0	O9:LPS	IgG	O9:LPS_IgG	EU	ST	ST-ST	ED	15.8	0
8531	Day 28	267.6	2.42749	1.33333	0.124939	O9:LPS	IgG	O9:LPS_IgG	EU	ST	ST-ST	ED	15.8	0
8531	Day 90	173	2.23805	0.861983	-0.0645013	O9:LPS	IgG	O9:LPS_IgG	EU	ST	ST-ST	ED	15.8	0
8553	Day 0	141.3	2.15014	1	0	O9:LPS	IgG	O9:LPS_IgG	EU	ST	ST-ST	nED	41.4	0
8553	Day 28	801.9	2.90412	5.67516	0.753978	O9:LPS	IgG	O9:LPS_IgG	EU	ST	ST-ST	nED	41.4	0
8553	Day 90	496.2	2.69566	3.51168	0.545515	O9:LPS	IgG	O9:LPS_IgG	EU	ST	ST-ST	nED	41.4	0
8555	Day 0	219.6	2.34163	1	0	O9:LPS	IgG	O9:LPS_IgG	EU	ST	ST	ED	NA	NA
8557	Day 0	262.5	2.41913	1	0	O9:LPS	IgG	O9:LPS_IgG	EU	ST	SPT-ST	nED	24.5	0
8599	Day 0	83.25	1.92038	1	0	O9:LPS	IgG	O9:LPS_IgG	EU	ST	ST	ED	NA	NA
8599	Day 28	573.3	2.75838	6.88649	0.837998	O9:LPS	IgG	O9:LPS_IgG	EU	ST	ST	ED	NA	NA
8599	Day 90	333.6	2.52323	4.00721	0.602842	O9:LPS	IgG	O9:LPS_IgG	EU	ST	ST	ED	NA	NA
8616	Day 0	91.5	1.96142	1	0	O9:LPS	IgG	O9:LPS_IgG	EU	ST	ST	ED	NA	NA
8616	Day 28	103.4	2.01452	1.13005	0.0530994	O9:LPS	IgG	O9:LPS_IgG	EU	ST	ST	ED	NA	NA
8616	Day 90	91	1.95904	0.994536	-0.0023797	O9:LPS	IgG	O9:LPS_IgG	EU	ST	ST	ED	NA	NA
8649	Day 0	55.1	1.74115	1	0	O9:LPS	IgG	O9:LPS_IgG	EU	ST	ST	ED	NA	NA
8649	Day 28	81.4	1.91062	1.47731	0.169473	O9:LPS	IgG	O9:LPS_IgG	EU	ST	ST	ED	NA	NA
8649	Day 90	78.3	1.89376	1.42105	0.15261	O9:LPS	IgG	O9:LPS_IgG	EU	ST	ST	ED	NA	NA
8673	Day 0	60.8	1.7839	1	0	O9:LPS	IgG	O9:LPS_IgG	EU	ST	ST-ST	ED	21.8	1
8673	Day 28	68.2	1.83378	1.12171	0.0498808	O9:LPS	IgG	O9:LPS_IgG	EU	ST	ST-ST	ED	21.8	1
8673	Day 90	36.8	1.56585	0.605263	-0.218056	O9:LPS	IgG	O9:LPS_IgG	EU	ST	ST-ST	ED	21.8	1
8679	Day 0	76	1.88081	1	0	O9:LPS	IgG	O9:LPS_IgG	EU	ST	ST-ST	ED	45.8	0
8679	Day 28	317.1	2.5012	4.17237	0.620383	O9:LPS	IgG	O9:LPS_IgG	EU	ST	ST-ST	ED	45.8	0
8679	Day 90	118.1	2.07225	1.55395	0.191436	O9:LPS	IgG	O9:LPS_IgG	EU	ST	ST-ST	ED	45.8	0
8694	Day 28	293.1	2.46702	NA	NA	O9:LPS	IgG	O9:LPS_IgG	EU	ST	ST	ED	NA	NA
8694	Day 90	78.5	1.89487	NA	NA	O9:LPS	IgG	O9:LPS_IgG	EU	ST	ST	ED	NA	NA
8697	Day 0	85.5	1.93197	1	0	O9:LPS	IgG	O9:LPS_IgG	EU	ST	ST-ST	ED	44.7	0
8697	Day 28	243.9	2.38721	2.85263	0.455246	O9:LPS	IgG	O9:LPS_IgG	EU	ST	ST-ST	ED	44.7	0
8697	Day 90	224.7	2.3516	2.62807	0.419637	O9:LPS	IgG	O9:LPS_IgG	EU	ST	ST-ST	ED	44.7	0
8708	Day 0	109.5	2.03941	1	0	O9:LPS	IgG	O9:LPS_IgG	EU	ST	ST-ST	nED	16.8	0
8708	Day 28	835.2	2.92179	7.6274	0.882376	O9:LPS	IgG	O9:LPS_IgG	EU	ST	ST-ST	nED	16.8	0
8708	Day 90	476.1	2.6777	4.34795	0.638284	O9:LPS	IgG	O9:LPS_IgG	EU	ST	ST-ST	nED	16.8	0
8713	Day 0	142.2	2.1529	1	0	O9:LPS	IgG	O9:LPS_IgG	EU	ST	ST	ED	NA	NA
8713	Day 28	256.8	2.4096	1.80591	0.256695	O9:LPS	IgG	O9:LPS_IgG	EU	ST	ST	ED	NA	NA
8713	Day 90	222.3	2.34694	1.56329	0.19404	O9:LPS	IgG	O9:LPS_IgG	EU	ST	ST	ED	NA	NA
8715	Day 0	33.3	1.52244	1	0	O9:LPS	IgG	O9:LPS_IgG	EU	ST	ST	ED	NA	NA
8761	Day 0	112.5	2.05115	1	0	O9:LPS	IgG	O9:LPS_IgG	EU	ST	SPT-ST	nED	19.1	0
8761	Day 28	112.5	2.05115	1	0	O9:LPS	IgG	O9:LPS_IgG	EU	ST	SPT-ST	nED	19.1	0
8764	Day 28	454.5	2.65753	NA	NA	O9:LPS	IgG	O9:LPS_IgG	EU	ST	ST-ST	nED	47.8	1
8764	Day 90	358.8	2.55485	NA	NA	O9:LPS	IgG	O9:LPS_IgG	EU	ST	ST-ST	nED	47.8	1
8770	Day 0	112.2	2.04999	1	0	O9:LPS	IgG	O9:LPS_IgG	EU	ST	ST-ST	ED	57.5	1
8770	Day 28	1599.3	3.20393	14.254	1.15394	O9:LPS	IgG	O9:LPS_IgG	EU	ST	ST-ST	ED	57.5	1
8770	Day 90	963.9	2.98403	8.59091	0.934039	O9:LPS	IgG	O9:LPS_IgG	EU	ST	ST-ST	ED	57.5	1
8803	Day 0	87.3	1.94101	1	0	O9:LPS	IgG	O9:LPS_IgG	EU	ST	ST	nED	NA	NA
8803	Day 28	90	1.95424	1.03093	0.0132283	O9:LPS	IgG	O9:LPS_IgG	EU	ST	ST	nED	NA	NA
8803	Day 90	60.5	1.78176	0.693013	-0.159259	O9:LPS	IgG	O9:LPS_IgG	EU	ST	ST	nED	NA	NA
8836	Day 0	532.8	2.72656	1	0	O9:LPS	IgG	O9:LPS_IgG	EU	ST	ST-ST	nED	14.7	0
8836	Day 28	468.9	2.67108	0.880068	-0.055484	O9:LPS	IgG	O9:LPS_IgG	EU	ST	ST-ST	nED	14.7	0
8836	Day 90	510	2.70757	0.957207	-0.018994	O9:LPS	IgG	O9:LPS_IgG	EU	ST	ST-ST	nED	14.7	0
8851	Day 0	47	1.6721	1	0	O9:LPS	IgG	O9:LPS_IgG	EU	ST	SPT-ST	ED	15.9	0
8851	Day 28	341.4	2.53326	7.26383	0.861166	O9:LPS	IgG	O9:LPS_IgG	EU	ST	SPT-ST	ED	15.9	0
8851	Day 90	286.8	2.45758	6.10213	0.785481	O9:LPS	IgG	O9:LPS_IgG	EU	ST	SPT-ST	ED	15.9	0
8852	Day 28	120.3	2.08027	NA	NA	O9:LPS	IgG	O9:LPS_IgG	EU	ST	ST-ST	nED	12	0
8852	Day 90	166.5	2.22141	NA	NA	O9:LPS	IgG	O9:LPS_IgG	EU	ST	ST-ST	nED	12	0
8904	Day 0	179.4	2.25382	1	0	O9:LPS	IgG	O9:LPS_IgG	EU	ST	ST-ST	ED	38.7	0
8904	Day 28	552.3	2.74218	3.0786	0.488353	O9:LPS	IgG	O9:LPS_IgG	EU	ST	ST-ST	ED	38.7	0
8904	Day 90	396.9	2.59868	2.21237	0.344859	O9:LPS	IgG	O9:LPS_IgG	EU	ST	ST-ST	ED	38.7	0
8928	Day 0	51	1.70757	1	0	O9:LPS	IgG	O9:LPS_IgG	EU	ST	ST-ST	ED	37.9	1
8928	Day 28	61.8	1.79099	1.21176	0.0834183	O9:LPS	IgG	O9:LPS_IgG	EU	ST	ST-ST	ED	37.9	1
8928	Day 90	40.7	1.60959	0.798039	-0.0979758	O9:LPS	IgG	O9:LPS_IgG	EU	ST	ST-ST	ED	37.9	1
8929	Day 0	107.1	2.02979	1	0	O9:LPS	IgG	O9:LPS_IgG	EU	ST	ST	nED	NA	NA
8043	Day 0	163.9	2.21458	1	0	O2:LPS	IgG	O2:LPS_IgG	EU	SPT	SPT-SPT	nED	14.2	1
8043	Day 28	249	2.3962	1.51922	0.18162	O2:LPS	IgG	O2:LPS_IgG	EU	SPT	SPT-SPT	nED	14.2	1
8043	Day 90	177.6	2.24944	1.08359	0.034864	O2:LPS	IgG	O2:LPS_IgG	EU	SPT	SPT-SPT	nED	14.2	1
8082	Day 0	215.1	2.33264	1	0	O2:LPS	IgG	O2:LPS_IgG	EU	SPT	SPT-SPT	ED	27.7	1
8082	Day 28	639.9	2.80611	2.9749	0.473472	O2:LPS	IgG	O2:LPS_IgG	EU	SPT	SPT-SPT	ED	27.7	1
8082	Day 90	387	2.58771	1.79916	0.255071	O2:LPS	IgG	O2:LPS_IgG	EU	SPT	SPT-SPT	ED	27.7	1
8090	Day 0	144	2.15836	1	0	O2:LPS	IgG	O2:LPS_IgG	EU	SPT	ST-SPT	ED	45.6	1
8090	Day 28	324.6	2.51135	2.25417	0.352986	O2:LPS	IgG	O2:LPS_IgG	EU	SPT	ST-SPT	ED	45.6	1
8090	Day 90	185.7	2.26881	1.28958	0.110449	O2:LPS	IgG	O2:LPS_IgG	EU	SPT	ST-SPT	ED	45.6	1
8091	Day 0	520.5	2.71642	1	0	O2:LPS	IgG	O2:LPS_IgG	EU	SPT	ST-SPT	ED	42.5	1
8091	Day 28	3447.9	3.53755	6.62421	0.821134	O2:LPS	IgG	O2:LPS_IgG	EU	SPT	ST-SPT	ED	42.5	1
8091	Day 90	2308.5	3.36333	4.43516	0.646909	O2:LPS	IgG	O2:LPS_IgG	EU	SPT	ST-SPT	ED	42.5	1
8092	Day 0	153.2	2.18526	1	0	O2:LPS	IgG	O2:LPS_IgG	EU	SPT	ST-SPT	nED	13.6	0
8092	Day 28	242.4	2.38453	1.58225	0.199274	O2:LPS	IgG	O2:LPS_IgG	EU	SPT	ST-SPT	nED	13.6	0
8092	Day 90	142.8	2.15473	0.932115	-0.0305306	O2:LPS	IgG	O2:LPS_IgG	EU	SPT	ST-SPT	nED	13.6	0
8094	Day 0	105.1	2.0216	1	0	O2:LPS	IgG	O2:LPS_IgG	EU	SPT	SPT	nED	NA	NA
8094	Day 28	127.7	2.10619	1.21503	0.0845882	O2:LPS	IgG	O2:LPS_IgG	EU	SPT	SPT	nED	NA	NA
8094	Day 90	132.4	2.12189	1.25975	0.100285	O2:LPS	IgG	O2:LPS_IgG	EU	SPT	SPT	nED	NA	NA
8102	Day 0	488.1	2.68851	1	0	O2:LPS	IgG	O2:LPS_IgG	EU	SPT	ST-SPT	nED	46.5	0
8102	Day 28	612	2.78675	1.25384	0.0982426	O2:LPS	IgG	O2:LPS_IgG	EU	SPT	ST-SPT	nED	46.5	0
8102	Day 90	954.9	2.97996	1.95636	0.291449	O2:LPS	IgG	O2:LPS_IgG	EU	SPT	ST-SPT	nED	46.5	0
8106	Day 0	282.3	2.45071	1	0	O2:LPS	IgG	O2:LPS_IgG	EU	SPT	SPT	nED	NA	NA
8106	Day 28	286.8	2.45758	1.01594	0.00686827	O2:LPS	IgG	O2:LPS_IgG	EU	SPT	SPT	nED	NA	NA
8106	Day 90	397.5	2.59934	1.40808	0.148626	O2:LPS	IgG	O2:LPS_IgG	EU	SPT	SPT	nED	NA	NA
8108	Day 0	371.4	2.56984	1	0	O2:LPS	IgG	O2:LPS_IgG	EU	SPT	SPT	nED	NA	NA
8108	Day 28	284.7	2.45439	0.766559	-0.115454	O2:LPS	IgG	O2:LPS_IgG	EU	SPT	SPT	nED	NA	NA
8122	Day 0	156	2.19312	1	0	O2:LPS	IgG	O2:LPS_IgG	EU	SPT	SPT	ED	NA	NA
8122	Day 28	139.2	2.14364	0.892308	-0.0494854	O2:LPS	IgG	O2:LPS_IgG	EU	SPT	SPT	ED	NA	NA
8122	Day 90	127.2	2.10449	0.815385	-0.0886375	O2:LPS	IgG	O2:LPS_IgG	EU	SPT	SPT	ED	NA	NA
8153	Day 0	291	2.46389	1	0	O2:LPS	IgG	O2:LPS_IgG	EU	SPT	ST-SPT	ED	16.8	1
8153	Day 28	4657.5	3.66815	16.0052	1.20426	O2:LPS	IgG	O2:LPS_IgG	EU	SPT	ST-SPT	ED	16.8	1
8153	Day 90	2716.2	3.43396	9.33402	0.970069	O2:LPS	IgG	O2:LPS_IgG	EU	SPT	ST-SPT	ED	16.8	1
8205	Day 0	200.7	2.30255	1	0	O2:LPS	IgG	O2:LPS_IgG	EU	SPT	ST-SPT	ED	48.9	1
8205	Day 28	953.1	2.97914	4.74888	0.676591	O2:LPS	IgG	O2:LPS_IgG	EU	SPT	ST-SPT	ED	48.9	1
8205	Day 90	234.6	2.37033	1.16891	0.0677806	O2:LPS	IgG	O2:LPS_IgG	EU	SPT	ST-SPT	ED	48.9	1
8236	Day 0	783	2.89376	1	0	O2:LPS	IgG	O2:LPS_IgG	EU	SPT	SPT-SPT	nED	17.6	1
8236	Day 28	994.5	2.9976	1.27011	0.103843	O2:LPS	IgG	O2:LPS_IgG	EU	SPT	SPT-SPT	nED	17.6	1
8236	Day 90	991.8	2.99642	1.26667	0.102662	O2:LPS	IgG	O2:LPS_IgG	EU	SPT	SPT-SPT	nED	17.6	1
8265	Day 0	216.9	2.33626	1	0	O2:LPS	IgG	O2:LPS_IgG	EU	SPT	SPT	ED	NA	NA
8265	Day 28	2835	3.45255	13.0705	1.11629	O2:LPS	IgG	O2:LPS_IgG	EU	SPT	SPT	ED	NA	NA
8265	Day 90	242.7	2.38507	1.11895	0.0488102	O2:LPS	IgG	O2:LPS_IgG	EU	SPT	SPT	ED	NA	NA
8277	Day 0	114.2	2.05767	1	0	O2:LPS	IgG	O2:LPS_IgG	EU	SPT	SPT-SPT	nED	16.6	0
8277	Day 28	138.1	2.14019	1.20928	0.0825276	O2:LPS	IgG	O2:LPS_IgG	EU	SPT	SPT-SPT	nED	16.6	0
8277	Day 90	144.1	2.15866	1.26182	0.100998	O2:LPS	IgG	O2:LPS_IgG	EU	SPT	SPT-SPT	nED	16.6	0
8287	Day 0	129.6	2.11261	1	0	O2:LPS	IgG	O2:LPS_IgG	EU	SPT	ST-SPT	nED	14.9	0
8287	Day 28	130	2.11394	1.00309	0.00133835	O2:LPS	IgG	O2:LPS_IgG	EU	SPT	ST-SPT	nED	14.9	0
8287	Day 90	209.7	2.3216	1.61806	0.208993	O2:LPS	IgG	O2:LPS_IgG	EU	SPT	ST-SPT	nED	14.9	0
8297	Day 0	306.9	2.487	1	0	O2:LPS	IgG	O2:LPS_IgG	EU	SPT	SPT	nED	NA	NA
8297	Day 28	344.7	2.53744	1.12317	0.0504444	O2:LPS	IgG	O2:LPS_IgG	EU	SPT	SPT	nED	NA	NA
8297	Day 90	390.9	2.59207	1.2737	0.105069	O2:LPS	IgG	O2:LPS_IgG	EU	SPT	SPT	nED	NA	NA
8322	Day 0	61.5	1.78888	1	0	O2:LPS	IgG	O2:LPS_IgG	EU	SPT	ST-SPT	ED	12.5	0
8322	Day 28	3885.3	3.58942	63.1756	1.80055	O2:LPS	IgG	O2:LPS_IgG	EU	SPT	ST-SPT	ED	12.5	0
8322	Day 90	1427.4	3.15455	23.2098	1.36567	O2:LPS	IgG	O2:LPS_IgG	EU	SPT	ST-SPT	ED	12.5	0
8354	Day 0	633	2.8014	1	0	O2:LPS	IgG	O2:LPS_IgG	EU	SPT	ST-SPT	nED	12.9	1
8354	Day 28	871.8	2.94042	1.37725	0.139013	O2:LPS	IgG	O2:LPS_IgG	EU	SPT	ST-SPT	nED	12.9	1
8354	Day 90	1174.8	3.06996	1.85592	0.26856	O2:LPS	IgG	O2:LPS_IgG	EU	SPT	ST-SPT	nED	12.9	1
8384	Day 0	60.6	1.78247	1	0	O2:LPS	IgG	O2:LPS_IgG	EU	SPT	SPT-SPT	nED	17.6	0
8384	Day 28	582.3	2.76515	9.60891	0.982674	O2:LPS	IgG	O2:LPS_IgG	EU	SPT	SPT-SPT	nED	17.6	0
8384	Day 90	191.4	2.28194	3.15842	0.499469	O2:LPS	IgG	O2:LPS_IgG	EU	SPT	SPT-SPT	nED	17.6	0
8393	Day 0	254.1	2.405	1	0	O2:LPS	IgG	O2:LPS_IgG	EU	SPT	ST-SPT	nED	46	0
8393	Day 28	265.8	2.42455	1.04604	0.0195503	O2:LPS	IgG	O2:LPS_IgG	EU	SPT	ST-SPT	nED	46	0
8393	Day 90	217.8	2.33806	0.857143	-0.0669468	O2:LPS	IgG	O2:LPS_IgG	EU	SPT	ST-SPT	nED	46	0
8419	Day 0	254.4	2.40552	1	0	O2:LPS	IgG	O2:LPS_IgG	EU	SPT	ST-SPT	nED	13.8	0
8419	Day 28	378	2.57749	1.48585	0.171975	O2:LPS	IgG	O2:LPS_IgG	EU	SPT	ST-SPT	nED	13.8	0
8419	Day 90	278.7	2.44514	1.09552	0.0396199	O2:LPS	IgG	O2:LPS_IgG	EU	SPT	ST-SPT	nED	13.8	0
8460	Day 0	239.1	2.37858	1	0	O2:LPS	IgG	O2:LPS_IgG	EU	SPT	ST-SPT	ED	46.2	0
8460	Day 28	4962.6	3.69571	20.7553	1.31713	O2:LPS	IgG	O2:LPS_IgG	EU	SPT	ST-SPT	ED	46.2	0
8460	Day 90	7038.9	3.8475	29.4391	1.46893	O2:LPS	IgG	O2:LPS_IgG	EU	SPT	ST-SPT	ED	46.2	0
8470	Day 0	1558.8	3.19279	1	0	O2:LPS	IgG	O2:LPS_IgG	EU	SPT	SPT	ED	NA	NA
8470	Day 28	4509	3.65408	2.89261	0.46129	O2:LPS	IgG	O2:LPS_IgG	EU	SPT	SPT	ED	NA	NA
8470	Day 90	1789.2	3.25266	1.14781	0.0598685	O2:LPS	IgG	O2:LPS_IgG	EU	SPT	SPT	ED	NA	NA
8471	Day 0	115.8	2.06371	1	0	O2:LPS	IgG	O2:LPS_IgG	EU	SPT	SPT-SPT	nED	15.7	0
8471	Day 28	118.7	2.07445	1.02504	0.0107422	O2:LPS	IgG	O2:LPS_IgG	EU	SPT	SPT-SPT	nED	15.7	0
8471	Day 90	92.7	1.96708	0.800518	-0.0966288	O2:LPS	IgG	O2:LPS_IgG	EU	SPT	SPT-SPT	nED	15.7	0
8488	Day 0	239.1	2.37858	1	0	O2:LPS	IgG	O2:LPS_IgG	EU	SPT	SPT	ED	NA	NA
8488	Day 28	2254.5	3.35305	9.42911	0.974471	O2:LPS	IgG	O2:LPS_IgG	EU	SPT	SPT	ED	NA	NA
8488	Day 90	222.3	2.34694	0.929737	-0.0316401	O2:LPS	IgG	O2:LPS_IgG	EU	SPT	SPT	ED	NA	NA
8493	Day 0	31.3	1.49554	1	0	O2:LPS	IgG	O2:LPS_IgG	EU	SPT	ST-SPT	ED	12.8	0
8493	Day 28	287.1	2.45803	9.17252	0.962489	O2:LPS	IgG	O2:LPS_IgG	EU	SPT	ST-SPT	ED	12.8	0
8493	Day 90	115.9	2.06408	3.70288	0.568539	O2:LPS	IgG	O2:LPS_IgG	EU	SPT	ST-SPT	ED	12.8	0
8512	Day 0	142.4	2.15351	1	0	O2:LPS	IgG	O2:LPS_IgG	EU	SPT	ST-SPT	nED	47.8	1
8512	Day 28	286.2	2.45667	2.00983	0.30316	O2:LPS	IgG	O2:LPS_IgG	EU	SPT	ST-SPT	nED	47.8	1
8512	Day 90	502.2	2.70088	3.52669	0.547367	O2:LPS	IgG	O2:LPS_IgG	EU	SPT	ST-SPT	nED	47.8	1
8537	Day 0	1225.2	3.08821	1	0	O2:LPS	IgG	O2:LPS_IgG	EU	SPT	ST-SPT	ED	13.4	0
8537	Day 28	3141	3.49707	2.56366	0.408861	O2:LPS	IgG	O2:LPS_IgG	EU	SPT	ST-SPT	ED	13.4	0
8537	Day 90	3007.8	3.47825	2.45495	0.390042	O2:LPS	IgG	O2:LPS_IgG	EU	SPT	ST-SPT	ED	13.4	0
8538	Day 0	1700.1	3.23047	1	0	O2:LPS	IgG	O2:LPS_IgG	EU	SPT	SPT-SPT	nED	23.6	1
8538	Day 28	1819.8	3.26002	1.07041	0.0295492	O2:LPS	IgG	O2:LPS_IgG	EU	SPT	SPT-SPT	nED	23.6	1
8538	Day 90	1449.9	3.16134	0.852832	-0.0691364	O2:LPS	IgG	O2:LPS_IgG	EU	SPT	SPT-SPT	nED	23.6	1
8547	Day 0	584.4	2.76671	1	0	O2:LPS	IgG	O2:LPS_IgG	EU	SPT	ST-SPT	nED	51.6	0
8547	Day 28	570	2.75587	0.975359	-0.0108354	O2:LPS	IgG	O2:LPS_IgG	EU	SPT	ST-SPT	nED	51.6	0
8547	Day 90	602.1	2.77967	1.03029	0.0129584	O2:LPS	IgG	O2:LPS_IgG	EU	SPT	ST-SPT	nED	51.6	0
8548	Day 0	280.5	2.44793	1	0	O2:LPS	IgG	O2:LPS_IgG	EU	SPT	SPT	ED	NA	NA
8548	Day 28	1576.8	3.19778	5.62139	0.749844	O2:LPS	IgG	O2:LPS_IgG	EU	SPT	SPT	ED	NA	NA
8548	Day 90	821.7	2.91471	2.92941	0.46678	O2:LPS	IgG	O2:LPS_IgG	EU	SPT	SPT	ED	NA	NA
8560	Day 0	682.2	2.83391	1	0	O2:LPS	IgG	O2:LPS_IgG	EU	SPT	SPT	ED	NA	NA
8560	Day 28	2729.7	3.43611	4.00132	0.602203	O2:LPS	IgG	O2:LPS_IgG	EU	SPT	SPT	ED	NA	NA
8560	Day 90	2330.1	3.36737	3.41557	0.533463	O2:LPS	IgG	O2:LPS_IgG	EU	SPT	SPT	ED	NA	NA
8562	Day 0	152.7	2.18384	1	0	O2:LPS	IgG	O2:LPS_IgG	EU	SPT	SPT	nED	NA	NA
8562	Day 28	178.8	2.25237	1.17092	0.0685285	O2:LPS	IgG	O2:LPS_IgG	EU	SPT	SPT	nED	NA	NA
8562	Day 90	128.1	2.10755	0.8389	-0.0762899	O2:LPS	IgG	O2:LPS_IgG	EU	SPT	SPT	nED	NA	NA
8563	Day 0	60.1	1.77887	1	0	O2:LPS	IgG	O2:LPS_IgG	EU	SPT	SPT-SPT	nED	14.9	0
8563	Day 28	75.3	1.87679	1.25291	0.0979205	O2:LPS	IgG	O2:LPS_IgG	EU	SPT	SPT-SPT	nED	14.9	0
8563	Day 90	65.1	1.81358	1.08319	0.0347065	O2:LPS	IgG	O2:LPS_IgG	EU	SPT	SPT-SPT	nED	14.9	0
8569	Day 0	1334.7	3.12538	1	0	O2:LPS	IgG	O2:LPS_IgG	EU	SPT	ST-SPT	nED	39	1
8569	Day 28	1626.3	3.2112	1.21848	0.085817	O2:LPS	IgG	O2:LPS_IgG	EU	SPT	ST-SPT	nED	39	1
8569	Day 90	1496.7	3.17513	1.12138	0.0497511	O2:LPS	IgG	O2:LPS_IgG	EU	SPT	ST-SPT	nED	39	1
8595	Day 0	169.8	2.22994	1	0	O2:LPS	IgG	O2:LPS_IgG	EU	SPT	SPT-SPT	ED	17	0
8595	Day 28	1658.7	3.21977	9.76855	0.98983	O2:LPS	IgG	O2:LPS_IgG	EU	SPT	SPT-SPT	ED	17	0
8595	Day 90	1448.1	3.1608	8.52827	0.930861	O2:LPS	IgG	O2:LPS_IgG	EU	SPT	SPT-SPT	ED	17	0
8611	Day 0	135	2.13033	1	0	O2:LPS	IgG	O2:LPS_IgG	EU	SPT	ST-SPT	ED	43.9	1
8611	Day 28	1808.1	3.25722	13.3933	1.12689	O2:LPS	IgG	O2:LPS_IgG	EU	SPT	ST-SPT	ED	43.9	1
8611	Day 90	327	2.51455	2.42222	0.384214	O2:LPS	IgG	O2:LPS_IgG	EU	SPT	ST-SPT	ED	43.9	1
8628	Day 0	229.2	2.36021	1	0	O2:LPS	IgG	O2:LPS_IgG	EU	SPT	SPT-SPT	nED	20.5	1
8628	Day 28	218.4	2.33925	0.95288	-0.020962	O2:LPS	IgG	O2:LPS_IgG	EU	SPT	SPT-SPT	nED	20.5	1
8628	Day 90	205.8	2.31345	0.897906	-0.0467692	O2:LPS	IgG	O2:LPS_IgG	EU	SPT	SPT-SPT	nED	20.5	1
8644	Day 0	269.7	2.43088	1	0	O2:LPS	IgG	O2:LPS_IgG	EU	SPT	SPT	nED	NA	NA
8644	Day 28	252.3	2.40192	0.935484	-0.0289637	O2:LPS	IgG	O2:LPS_IgG	EU	SPT	SPT	nED	NA	NA
8689	Day 0	156.7	2.19507	1	0	O2:LPS	IgG	O2:LPS_IgG	EU	SPT	SPT-SPT	nED	16.6	0
8689	Day 28	164.9	2.21722	1.05233	0.0221517	O2:LPS	IgG	O2:LPS_IgG	EU	SPT	SPT-SPT	nED	16.6	0
8689	Day 90	348	2.54158	2.2208	0.34651	O2:LPS	IgG	O2:LPS_IgG	EU	SPT	SPT-SPT	nED	16.6	0
8702	Day 0	158.8	2.20085	1	0	O2:LPS	IgG	O2:LPS_IgG	EU	SPT	SPT	ED	NA	NA
8702	Day 28	4792.5	3.68056	30.1795	1.47971	O2:LPS	IgG	O2:LPS_IgG	EU	SPT	SPT	ED	NA	NA
8702	Day 90	3734.1	3.57219	23.5145	1.37134	O2:LPS	IgG	O2:LPS_IgG	EU	SPT	SPT	ED	NA	NA
8735	Day 0	239.4	2.37912	1	0	O2:LPS	IgG	O2:LPS_IgG	EU	SPT	SPT	ED	NA	NA
8735	Day 28	2397.6	3.37978	10.015	1.00065	O2:LPS	IgG	O2:LPS_IgG	EU	SPT	SPT	ED	NA	NA
8762	Day 0	769.5	2.88621	1	0	O2:LPS	IgG	O2:LPS_IgG	EU	SPT	SPT-SPT	ED	19.6	0
8762	Day 28	324.6	2.51135	0.421832	-0.37486	O2:LPS	IgG	O2:LPS_IgG	EU	SPT	SPT-SPT	ED	19.6	0
8762	Day 90	508.2	2.70603	0.660429	-0.180174	O2:LPS	IgG	O2:LPS_IgG	EU	SPT	SPT-SPT	ED	19.6	0
8766	Day 0	208.2	2.31848	1	0	O2:LPS	IgG	O2:LPS_IgG	EU	SPT	ST-SPT	ED	41.6	1
8766	Day 28	3393.9	3.5307	16.3012	1.21222	O2:LPS	IgG	O2:LPS_IgG	EU	SPT	ST-SPT	ED	41.6	1
8766	Day 90	1611	3.2071	7.73775	0.888615	O2:LPS	IgG	O2:LPS_IgG	EU	SPT	ST-SPT	ED	41.6	1
8772	Day 0	708.3	2.85022	1	0	O2:LPS	IgG	O2:LPS_IgG	EU	SPT	ST-SPT	nED	14.3	0
8772	Day 28	687.6	2.83734	0.970775	-0.0128814	O2:LPS	IgG	O2:LPS_IgG	EU	SPT	ST-SPT	nED	14.3	0
8772	Day 90	666.9	2.82406	0.94155	-0.0261565	O2:LPS	IgG	O2:LPS_IgG	EU	SPT	ST-SPT	nED	14.3	0
8793	Day 0	102.9	2.01242	1	0	O2:LPS	IgG	O2:LPS_IgG	EU	SPT	ST-SPT	ED	14.2	1
8793	Day 28	896.4	2.9525	8.71137	0.940086	O2:LPS	IgG	O2:LPS_IgG	EU	SPT	ST-SPT	ED	14.2	1
8793	Day 90	332.4	2.52166	3.23032	0.509246	O2:LPS	IgG	O2:LPS_IgG	EU	SPT	ST-SPT	ED	14.2	1
8805	Day 0	185.7	2.26881	1	0	O2:LPS	IgG	O2:LPS_IgG	EU	SPT	SPT	nED	NA	NA
8805	Day 28	309	2.48996	1.66397	0.221147	O2:LPS	IgG	O2:LPS_IgG	EU	SPT	SPT	nED	NA	NA
8805	Day 90	154.2	2.18808	0.830372	-0.0807275	O2:LPS	IgG	O2:LPS_IgG	EU	SPT	SPT	nED	NA	NA
8825	Day 0	117.6	2.07041	1	0	O2:LPS	IgG	O2:LPS_IgG	EU	SPT	ST-SPT	nED	44	0
8825	Day 28	202.2	2.30578	1.71939	0.235374	O2:LPS	IgG	O2:LPS_IgG	EU	SPT	ST-SPT	nED	44	0
8825	Day 90	169.8	2.22994	1.44388	0.15953	O2:LPS	IgG	O2:LPS_IgG	EU	SPT	ST-SPT	nED	44	0
8834	Day 0	1147.5	3.05975	1	0	O2:LPS	IgG	O2:LPS_IgG	EU	SPT	ST-SPT	ED	12.2	1
8834	Day 28	17496	4.24294	15.2471	1.18319	O2:LPS	IgG	O2:LPS_IgG	EU	SPT	ST-SPT	ED	12.2	1
8834	Day 90	8561.7	3.93256	7.46118	0.872807	O2:LPS	IgG	O2:LPS_IgG	EU	SPT	ST-SPT	ED	12.2	1
8862	Day 0	148.5	2.17173	1	0	O2:LPS	IgG	O2:LPS_IgG	EU	SPT	ST-SPT	ED	14.3	1
8862	Day 28	288.3	2.45984	1.94141	0.288118	O2:LPS	IgG	O2:LPS_IgG	EU	SPT	ST-SPT	ED	14.3	1
8940	Day 0	160.4	2.2052	1	0	O2:LPS	IgG	O2:LPS_IgG	EU	SPT	ST-SPT	nED	67.9	0
8940	Day 28	140.7	2.14829	0.877182	-0.0569103	O2:LPS	IgG	O2:LPS_IgG	EU	SPT	ST-SPT	nED	67.9	0
8940	Day 90	115	2.0607	0.716958	-0.144507	O2:LPS	IgG	O2:LPS_IgG	EU	SPT	ST-SPT	nED	67.9	0
8949	Day 0	629.1	2.79872	1	0	O2:LPS	IgG	O2:LPS_IgG	EU	SPT	SPT	ED	NA	NA
8949	Day 28	11299.5	4.05306	17.9614	1.25434	O2:LPS	IgG	O2:LPS_IgG	EU	SPT	SPT	ED	NA	NA
8949	Day 90	6431.4	3.80831	10.2232	1.00959	O2:LPS	IgG	O2:LPS_IgG	EU	SPT	SPT	ED	NA	NA
8953	Day 0	277.2	2.44279	1	0	O2:LPS	IgG	O2:LPS_IgG	EU	SPT	SPT	nED	NA	NA
8953	Day 28	5022	3.70088	18.1169	1.25808	O2:LPS	IgG	O2:LPS_IgG	EU	SPT	SPT	nED	NA	NA
8953	Day 90	1315.8	3.11919	4.74675	0.676397	O2:LPS	IgG	O2:LPS_IgG	EU	SPT	SPT	nED	NA	NA
8970	Day 0	1003.5	3.00152	1	0	O2:LPS	IgG	O2:LPS_IgG	EU	SPT	SPT-SPT	nED	15.6	0
8970	Day 28	1526.4	3.18367	1.52108	0.182151	O2:LPS	IgG	O2:LPS_IgG	EU	SPT	SPT-SPT	nED	15.6	0
8970	Day 90	896.4	2.9525	0.893274	-0.0490155	O2:LPS	IgG	O2:LPS_IgG	EU	SPT	SPT-SPT	nED	15.6	0
8971	Day 0	546.3	2.73743	1	0	O2:LPS	IgG	O2:LPS_IgG	EU	SPT	ST-SPT	ED	39.5	1
8971	Day 28	1352.7	3.1312	2.47611	0.39377	O2:LPS	IgG	O2:LPS_IgG	EU	SPT	ST-SPT	ED	39.5	1
8971	Day 90	1314	3.1186	2.40527	0.381164	O2:LPS	IgG	O2:LPS_IgG	EU	SPT	ST-SPT	ED	39.5	1
8976	Day 0	515.7	2.7124	1	0	O2:LPS	IgG	O2:LPS_IgG	EU	SPT	ST-SPT	nED	12.9	0
8976	Day 28	481.5	2.6826	0.933682	-0.0298008	O2:LPS	IgG	O2:LPS_IgG	EU	SPT	ST-SPT	nED	12.9	0
8976	Day 90	556.2	2.74523	1.07853	0.0328339	O2:LPS	IgG	O2:LPS_IgG	EU	SPT	ST-SPT	nED	12.9	0
8982	Day 0	220.2	2.34282	1	0	O2:LPS	IgG	O2:LPS_IgG	EU	SPT	SPT	nED	NA	NA
8982	Day 28	294	2.46835	1.33515	0.12553	O2:LPS	IgG	O2:LPS_IgG	EU	SPT	SPT	nED	NA	NA
8982	Day 90	161.2	2.20737	0.732062	-0.135452	O2:LPS	IgG	O2:LPS_IgG	EU	SPT	SPT	nED	NA	NA
8043	Day 0	76.9	1.88593	1	0	O2:LPS	IgA	O2:LPS_IgA	EU	SPT	SPT-SPT	nED	14.2	1
8043	Day 28	85.4	1.93146	1.11053	0.0455315	O2:LPS	IgA	O2:LPS_IgA	EU	SPT	SPT-SPT	nED	14.2	1
8043	Day 90	90.3	1.95569	1.17425	0.0697614	O2:LPS	IgA	O2:LPS_IgA	EU	SPT	SPT-SPT	nED	14.2	1
8082	Day 0	67.6	1.82995	1	0	O2:LPS	IgA	O2:LPS_IgA	EU	SPT	SPT-SPT	ED	27.7	1
8082	Day 28	260.7	2.41614	3.85651	0.586194	O2:LPS	IgA	O2:LPS_IgA	EU	SPT	SPT-SPT	ED	27.7	1
8082	Day 90	84	1.92428	1.2426	0.0943326	O2:LPS	IgA	O2:LPS_IgA	EU	SPT	SPT-SPT	ED	27.7	1
8090	Day 0	48.5	1.68574	1	0	O2:LPS	IgA	O2:LPS_IgA	EU	SPT	ST-SPT	ED	45.6	1
8090	Day 28	315.9	2.49955	6.5134	0.813808	O2:LPS	IgA	O2:LPS_IgA	EU	SPT	ST-SPT	ED	45.6	1
8090	Day 90	61.6	1.78958	1.2701	0.103839	O2:LPS	IgA	O2:LPS_IgA	EU	SPT	ST-SPT	ED	45.6	1
8091	Day 0	94.1	1.97359	1	0	O2:LPS	IgA	O2:LPS_IgA	EU	SPT	ST-SPT	ED	42.5	1
8091	Day 28	990.9	2.99603	10.5303	1.02244	O2:LPS	IgA	O2:LPS_IgA	EU	SPT	ST-SPT	ED	42.5	1
8091	Day 90	186	2.26951	1.97662	0.295923	O2:LPS	IgA	O2:LPS_IgA	EU	SPT	ST-SPT	ED	42.5	1
8092	Day 0	201.9	2.30514	1	0	O2:LPS	IgA	O2:LPS_IgA	EU	SPT	ST-SPT	nED	13.6	0
8092	Day 28	202.8	2.30707	1.00446	0.00193163	O2:LPS	IgA	O2:LPS_IgA	EU	SPT	ST-SPT	nED	13.6	0
8092	Day 90	199.3	2.29951	0.987122	-0.00562902	O2:LPS	IgA	O2:LPS_IgA	EU	SPT	ST-SPT	nED	13.6	0
8094	Day 0	41.3	1.61542	1	0	O2:LPS	IgA	O2:LPS_IgA	EU	SPT	SPT	nED	NA	NA
8094	Day 28	36.2	1.55871	0.877576	-0.0567154	O2:LPS	IgA	O2:LPS_IgA	EU	SPT	SPT	nED	NA	NA
8094	Day 90	33	1.51818	0.799394	-0.0972391	O2:LPS	IgA	O2:LPS_IgA	EU	SPT	SPT	nED	NA	NA
8102	Day 0	149.8	2.17551	1	0	O2:LPS	IgA	O2:LPS_IgA	EU	SPT	ST-SPT	nED	46.5	0
8102	Day 28	135.7	2.13258	0.905874	-0.042932	O2:LPS	IgA	O2:LPS_IgA	EU	SPT	ST-SPT	nED	46.5	0
8102	Day 90	193	2.28556	1.28838	0.110045	O2:LPS	IgA	O2:LPS_IgA	EU	SPT	ST-SPT	nED	46.5	0
8106	Day 0	66.7	1.82413	1	0	O2:LPS	IgA	O2:LPS_IgA	EU	SPT	SPT	nED	NA	NA
8106	Day 28	68.8	1.83759	1.03148	0.0134626	O2:LPS	IgA	O2:LPS_IgA	EU	SPT	SPT	nED	NA	NA
8106	Day 90	78.5	1.89487	1.17691	0.0707438	O2:LPS	IgA	O2:LPS_IgA	EU	SPT	SPT	nED	NA	NA
8108	Day 0	151.4	2.18013	1	0	O2:LPS	IgA	O2:LPS_IgA	EU	SPT	SPT	nED	NA	NA
8108	Day 28	119.5	2.07737	0.7893	-0.102758	O2:LPS	IgA	O2:LPS_IgA	EU	SPT	SPT	nED	NA	NA
8122	Day 0	64.9	1.81224	1	0	O2:LPS	IgA	O2:LPS_IgA	EU	SPT	SPT	ED	NA	NA
8122	Day 28	70.4	1.84757	1.08475	0.035328	O2:LPS	IgA	O2:LPS_IgA	EU	SPT	SPT	ED	NA	NA
8122	Day 90	38.2	1.58206	0.588598	-0.230181	O2:LPS	IgA	O2:LPS_IgA	EU	SPT	SPT	ED	NA	NA
8153	Day 0	109.4	2.03902	1	0	O2:LPS	IgA	O2:LPS_IgA	EU	SPT	ST-SPT	ED	16.8	1
8153	Day 28	1257.3	3.09944	11.4927	1.06042	O2:LPS	IgA	O2:LPS_IgA	EU	SPT	ST-SPT	ED	16.8	1
8153	Day 90	284.7	2.45439	2.60238	0.41537	O2:LPS	IgA	O2:LPS_IgA	EU	SPT	ST-SPT	ED	16.8	1
8205	Day 0	115.9	2.06408	1	0	O2:LPS	IgA	O2:LPS_IgA	EU	SPT	ST-SPT	ED	48.9	1
8205	Day 28	518.1	2.71441	4.47023	0.65033	O2:LPS	IgA	O2:LPS_IgA	EU	SPT	ST-SPT	ED	48.9	1
8205	Day 90	314.4	2.49748	2.71268	0.433399	O2:LPS	IgA	O2:LPS_IgA	EU	SPT	ST-SPT	ED	48.9	1
8236	Day 0	397.5	2.59934	1	0	O2:LPS	IgA	O2:LPS_IgA	EU	SPT	SPT-SPT	nED	17.6	1
8236	Day 28	810.9	2.90897	2.04	0.30963	O2:LPS	IgA	O2:LPS_IgA	EU	SPT	SPT-SPT	nED	17.6	1
8236	Day 90	802.8	2.90461	2.01962	0.30527	O2:LPS	IgA	O2:LPS_IgA	EU	SPT	SPT-SPT	nED	17.6	1
8265	Day 0	98.4	1.993	1	0	O2:LPS	IgA	O2:LPS_IgA	EU	SPT	SPT	ED	NA	NA
8265	Day 28	3715.2	3.56998	37.7561	1.57699	O2:LPS	IgA	O2:LPS_IgA	EU	SPT	SPT	ED	NA	NA
8265	Day 90	151.1	2.17926	1.53557	0.186269	O2:LPS	IgA	O2:LPS_IgA	EU	SPT	SPT	ED	NA	NA
8277	Day 0	28.7	1.45788	1	0	O2:LPS	IgA	O2:LPS_IgA	EU	SPT	SPT-SPT	nED	16.6	0
8277	Day 28	36.6	1.56348	1.27526	0.105599	O2:LPS	IgA	O2:LPS_IgA	EU	SPT	SPT-SPT	nED	16.6	0
8277	Day 90	28.4	1.45332	0.989547	-0.00456356	O2:LPS	IgA	O2:LPS_IgA	EU	SPT	SPT-SPT	nED	16.6	0
8287	Day 0	77.1	1.88705	1	0	O2:LPS	IgA	O2:LPS_IgA	EU	SPT	ST-SPT	nED	14.9	0
8287	Day 28	77.6	1.88986	1.00649	0.00280734	O2:LPS	IgA	O2:LPS_IgA	EU	SPT	ST-SPT	nED	14.9	0
8287	Day 90	85.4	1.93146	1.10765	0.0444035	O2:LPS	IgA	O2:LPS_IgA	EU	SPT	ST-SPT	nED	14.9	0
8297	Day 0	281.4	2.44932	1	0	O2:LPS	IgA	O2:LPS_IgA	EU	SPT	SPT	nED	NA	NA
8297	Day 28	275.1	2.43949	0.977612	-0.0098335	O2:LPS	IgA	O2:LPS_IgA	EU	SPT	SPT	nED	NA	NA
8297	Day 90	339.9	2.53135	1.20789	0.0820271	O2:LPS	IgA	O2:LPS_IgA	EU	SPT	SPT	nED	NA	NA
8322	Day 0	84.7	1.92788	1	0	O2:LPS	IgA	O2:LPS_IgA	EU	SPT	ST-SPT	ED	12.5	0
8322	Day 28	1558.8	3.19279	18.4038	1.26491	O2:LPS	IgA	O2:LPS_IgA	EU	SPT	ST-SPT	ED	12.5	0
8322	Day 90	249.3	2.39664	2.94274	0.468752	O2:LPS	IgA	O2:LPS_IgA	EU	SPT	ST-SPT	ED	12.5	0
8354	Day 0	118.5	2.07372	1	0	O2:LPS	IgA	O2:LPS_IgA	EU	SPT	ST-SPT	nED	12.9	1
8354	Day 28	144.4	2.15957	1.21857	0.0858488	O2:LPS	IgA	O2:LPS_IgA	EU	SPT	ST-SPT	nED	12.9	1
8354	Day 90	118.5	2.07372	1	0	O2:LPS	IgA	O2:LPS_IgA	EU	SPT	ST-SPT	nED	12.9	1
8384	Day 0	64.6	1.81023	1	0	O2:LPS	IgA	O2:LPS_IgA	EU	SPT	SPT-SPT	nED	17.6	0
8384	Day 28	2991.6	3.4759	46.3096	1.66567	O2:LPS	IgA	O2:LPS_IgA	EU	SPT	SPT-SPT	nED	17.6	0
8384	Day 90	156.6	2.19479	2.42415	0.384559	O2:LPS	IgA	O2:LPS_IgA	EU	SPT	SPT-SPT	nED	17.6	0
8393	Day 0	109.9	2.041	1	0	O2:LPS	IgA	O2:LPS_IgA	EU	SPT	ST-SPT	nED	46	0
8393	Day 28	104.5	2.01912	0.950864	-0.0218814	O2:LPS	IgA	O2:LPS_IgA	EU	SPT	ST-SPT	nED	46	0
8393	Day 90	86.1	1.935	0.783439	-0.105995	O2:LPS	IgA	O2:LPS_IgA	EU	SPT	ST-SPT	nED	46	0
8419	Day 0	117.4	2.06967	1	0	O2:LPS	IgA	O2:LPS_IgA	EU	SPT	ST-SPT	nED	13.8	0
8419	Day 28	225.6	2.35334	1.92164	0.283671	O2:LPS	IgA	O2:LPS_IgA	EU	SPT	ST-SPT	nED	13.8	0
8419	Day 90	79	1.89763	0.672913	-0.172041	O2:LPS	IgA	O2:LPS_IgA	EU	SPT	ST-SPT	nED	13.8	0
8460	Day 0	75.9	1.88024	1	0	O2:LPS	IgA	O2:LPS_IgA	EU	SPT	ST-SPT	ED	46.2	0
8460	Day 28	4689.9	3.67116	61.7905	1.79092	O2:LPS	IgA	O2:LPS_IgA	EU	SPT	ST-SPT	ED	46.2	0
8460	Day 90	1189.8	3.07547	15.6759	1.19523	O2:LPS	IgA	O2:LPS_IgA	EU	SPT	ST-SPT	ED	46.2	0
8470	Day 0	279.9	2.447	1	0	O2:LPS	IgA	O2:LPS_IgA	EU	SPT	SPT	ED	NA	NA
8470	Day 28	5524.2	3.74227	19.7363	1.29527	O2:LPS	IgA	O2:LPS_IgA	EU	SPT	SPT	ED	NA	NA
8470	Day 90	345.6	2.53857	1.23473	0.0915708	O2:LPS	IgA	O2:LPS_IgA	EU	SPT	SPT	ED	NA	NA
8471	Day 0	61.2	1.78675	1	0	O2:LPS	IgA	O2:LPS_IgA	EU	SPT	SPT-SPT	nED	15.7	0
8471	Day 28	79.4	1.89982	1.29739	0.113069	O2:LPS	IgA	O2:LPS_IgA	EU	SPT	SPT-SPT	nED	15.7	0
8471	Day 90	64.2	1.80754	1.04902	0.0207836	O2:LPS	IgA	O2:LPS_IgA	EU	SPT	SPT-SPT	nED	15.7	0
8488	Day 0	91.2	1.95999	1	0	O2:LPS	IgA	O2:LPS_IgA	EU	SPT	SPT	ED	NA	NA
8488	Day 28	3739.5	3.57281	41.0033	1.61282	O2:LPS	IgA	O2:LPS_IgA	EU	SPT	SPT	ED	NA	NA
8488	Day 90	117.2	2.06893	1.28509	0.108933	O2:LPS	IgA	O2:LPS_IgA	EU	SPT	SPT	ED	NA	NA
8493	Day 0	24.6	1.39094	1	0	O2:LPS	IgA	O2:LPS_IgA	EU	SPT	ST-SPT	ED	12.8	0
8493	Day 28	158	2.19866	6.42276	0.807722	O2:LPS	IgA	O2:LPS_IgA	EU	SPT	ST-SPT	ED	12.8	0
8493	Day 90	33.2	1.52114	1.34959	0.130203	O2:LPS	IgA	O2:LPS_IgA	EU	SPT	ST-SPT	ED	12.8	0
8512	Day 0	107.6	2.03181	1	0	O2:LPS	IgA	O2:LPS_IgA	EU	SPT	ST-SPT	nED	47.8	1
8512	Day 28	344.7	2.53744	3.20353	0.505629	O2:LPS	IgA	O2:LPS_IgA	EU	SPT	ST-SPT	nED	47.8	1
8512	Day 90	396.9	2.59868	3.68866	0.566869	O2:LPS	IgA	O2:LPS_IgA	EU	SPT	ST-SPT	nED	47.8	1
8537	Day 0	1865.7	3.27084	1	0	O2:LPS	IgA	O2:LPS_IgA	EU	SPT	ST-SPT	ED	13.4	0
8537	Day 28	20509.2	4.31195	10.9928	1.04111	O2:LPS	IgA	O2:LPS_IgA	EU	SPT	ST-SPT	ED	13.4	0
8537	Day 90	2921.4	3.46559	1.56585	0.194749	O2:LPS	IgA	O2:LPS_IgA	EU	SPT	ST-SPT	ED	13.4	0
8538	Day 0	292.2	2.46568	1	0	O2:LPS	IgA	O2:LPS_IgA	EU	SPT	SPT-SPT	nED	23.6	1
8538	Day 28	253.2	2.40346	0.86653	-0.0622165	O2:LPS	IgA	O2:LPS_IgA	EU	SPT	SPT-SPT	nED	23.6	1
8538	Day 90	249.3	2.39672	0.853183	-0.0689579	O2:LPS	IgA	O2:LPS_IgA	EU	SPT	SPT-SPT	nED	23.6	1
8547	Day 0	79.6	1.90091	1	0	O2:LPS	IgA	O2:LPS_IgA	EU	SPT	ST-SPT	nED	51.6	0
8547	Day 28	76.4	1.88309	0.959799	-0.0178197	O2:LPS	IgA	O2:LPS_IgA	EU	SPT	ST-SPT	nED	51.6	0
8547	Day 90	91.8	1.96284	1.15327	0.0619296	O2:LPS	IgA	O2:LPS_IgA	EU	SPT	ST-SPT	nED	51.6	0
8548	Day 0	164.3	2.21564	1	0	O2:LPS	IgA	O2:LPS_IgA	EU	SPT	SPT	ED	NA	NA
8548	Day 28	543.9	2.73552	3.31041	0.519881	O2:LPS	IgA	O2:LPS_IgA	EU	SPT	SPT	ED	NA	NA
8548	Day 90	167	2.22272	1.01643	0.00707891	O2:LPS	IgA	O2:LPS_IgA	EU	SPT	SPT	ED	NA	NA
8560	Day 0	249.6	2.39724	1	0	O2:LPS	IgA	O2:LPS_IgA	EU	SPT	SPT	ED	NA	NA
8560	Day 28	897.3	2.95294	3.59495	0.555693	O2:LPS	IgA	O2:LPS_IgA	EU	SPT	SPT	ED	NA	NA
8560	Day 90	345.6	2.53857	1.38462	0.141329	O2:LPS	IgA	O2:LPS_IgA	EU	SPT	SPT	ED	NA	NA
8562	Day 0	188.8	2.276	1	0	O2:LPS	IgA	O2:LPS_IgA	EU	SPT	SPT	nED	NA	NA
8562	Day 28	301.8	2.47972	1.59852	0.203717	O2:LPS	IgA	O2:LPS_IgA	EU	SPT	SPT	nED	NA	NA
8562	Day 90	168.7	2.22712	0.893538	-0.0488869	O2:LPS	IgA	O2:LPS_IgA	EU	SPT	SPT	nED	NA	NA
8563	Day 0	204	2.30963	1	0	O2:LPS	IgA	O2:LPS_IgA	EU	SPT	SPT-SPT	nED	14.9	0
8563	Day 28	207.9	2.31785	1.01912	0.00822432	O2:LPS	IgA	O2:LPS_IgA	EU	SPT	SPT-SPT	nED	14.9	0
8563	Day 90	285.9	2.45621	1.40147	0.146584	O2:LPS	IgA	O2:LPS_IgA	EU	SPT	SPT-SPT	nED	14.9	0
8569	Day 0	2484	3.39515	1	0	O2:LPS	IgA	O2:LPS_IgA	EU	SPT	ST-SPT	nED	39	1
8569	Day 28	2786.4	3.44504	1.12174	0.0498919	O2:LPS	IgA	O2:LPS_IgA	EU	SPT	ST-SPT	nED	39	1
8569	Day 90	2716.2	3.43396	1.09348	0.0388102	O2:LPS	IgA	O2:LPS_IgA	EU	SPT	ST-SPT	nED	39	1
8595	Day 0	133.5	2.12548	1	0	O2:LPS	IgA	O2:LPS_IgA	EU	SPT	SPT-SPT	ED	17	0
8595	Day 28	496.7	2.69605	3.72022	0.570569	O2:LPS	IgA	O2:LPS_IgA	EU	SPT	SPT-SPT	ED	17	0
8595	Day 90	197.7	2.29601	1.4809	0.170525	O2:LPS	IgA	O2:LPS_IgA	EU	SPT	SPT-SPT	ED	17	0
8611	Day 0	72.1	1.85794	1	0	O2:LPS	IgA	O2:LPS_IgA	EU	SPT	ST-SPT	ED	43.9	1
8611	Day 28	1744.2	3.2416	24.1914	1.38366	O2:LPS	IgA	O2:LPS_IgA	EU	SPT	ST-SPT	ED	43.9	1
8611	Day 90	261.3	2.41714	3.62413	0.559204	O2:LPS	IgA	O2:LPS_IgA	EU	SPT	ST-SPT	ED	43.9	1
8628	Day 0	148	2.17026	1	0	O2:LPS	IgA	O2:LPS_IgA	EU	SPT	SPT-SPT	nED	20.5	1
8628	Day 28	140.6	2.14799	0.95	-0.0222764	O2:LPS	IgA	O2:LPS_IgA	EU	SPT	SPT-SPT	nED	20.5	1
8628	Day 90	141.6	2.15106	0.956757	-0.0191985	O2:LPS	IgA	O2:LPS_IgA	EU	SPT	SPT-SPT	nED	20.5	1
8644	Day 0	58.5	1.76716	1	0	O2:LPS	IgA	O2:LPS_IgA	EU	SPT	SPT	nED	NA	NA
8644	Day 28	66.9	1.82543	1.14359	0.0582703	O2:LPS	IgA	O2:LPS_IgA	EU	SPT	SPT	nED	NA	NA
8689	Day 0	178.9	2.25261	1	0	O2:LPS	IgA	O2:LPS_IgA	EU	SPT	SPT-SPT	nED	16.6	0
8689	Day 28	188.3	2.27485	1.48327	0.171221	O2:LPS	IgA	O2:LPS_IgA	EU	SPT	SPT-SPT	nED	16.6	0
8689	Day 90	279.3	2.44607	0.583112	-0.234248	O2:LPS	IgA	O2:LPS_IgA	EU	SPT	SPT-SPT	nED	16.6	0
8702	Day 0	109.8	2.0406	1	0	O2:LPS	IgA	O2:LPS_IgA	EU	SPT	SPT	ED	NA	NA
8702	Day 28	602.1	2.77967	0.271383	-0.566417	O2:LPS	IgA	O2:LPS_IgA	EU	SPT	SPT	ED	NA	NA
8702	Day 90	163.4	2.21325	0.0491613	-1.30838	O2:LPS	IgA	O2:LPS_IgA	EU	SPT	SPT	ED	NA	NA
8735	Day 0	29.6	1.47129	1	0	O2:LPS	IgA	O2:LPS_IgA	EU	SPT	SPT	ED	NA	NA
8735	Day 28	1755	3.24428	0.204615	-0.689062	O2:LPS	IgA	O2:LPS_IgA	EU	SPT	SPT	ED	NA	NA
8762	Day 0	359.1	2.55522	1	0	O2:LPS	IgA	O2:LPS_IgA	EU	SPT	SPT-SPT	ED	19.6	0
8762	Day 28	742.5	2.8707	0.333333	-0.477121	O2:LPS	IgA	O2:LPS_IgA	EU	SPT	SPT-SPT	ED	19.6	0
8762	Day 90	314.1	2.49707	6.31662	0.800485	O2:LPS	IgA	O2:LPS_IgA	EU	SPT	SPT-SPT	ED	19.6	0
8766	Day 0	104.7	2.01995	1	0	O2:LPS	IgA	O2:LPS_IgA	EU	SPT	ST-SPT	ED	41.6	1
8766	Day 28	1984.1	3.29755	0.917786	-0.0372585	O2:LPS	IgA	O2:LPS_IgA	EU	SPT	ST-SPT	ED	41.6	1
8766	Day 90	186.1	2.26975	1.12681	0.0518521	O2:LPS	IgA	O2:LPS_IgA	EU	SPT	ST-SPT	ED	41.6	1
8772	Day 0	170.8	2.23249	1	0	O2:LPS	IgA	O2:LPS_IgA	EU	SPT	ST-SPT	nED	14.3	0
8772	Day 28	209.7	2.3216	1.07363	0.0308547	O2:LPS	IgA	O2:LPS_IgA	EU	SPT	ST-SPT	nED	14.3	0
8772	Day 90	175.2	2.24353	5.0137	0.700158	O2:LPS	IgA	O2:LPS_IgA	EU	SPT	ST-SPT	nED	14.3	0
8793	Day 0	188.1	2.27439	1	0	O2:LPS	IgA	O2:LPS_IgA	EU	SPT	ST-SPT	ED	14.2	1
8793	Day 28	878.4	2.94369	0.297909	-0.525917	O2:LPS	IgA	O2:LPS_IgA	EU	SPT	ST-SPT	ED	14.2	1
8793	Day 90	234.3	2.36977	0.362783	-0.440353	O2:LPS	IgA	O2:LPS_IgA	EU	SPT	ST-SPT	ED	14.2	1
8805	Day 0	69.8	1.84386	1	0	O2:LPS	IgA	O2:LPS_IgA	EU	SPT	SPT	nED	NA	NA
8805	Day 28	85	1.92942	0.378415	-0.422031	O2:LPS	IgA	O2:LPS_IgA	EU	SPT	SPT	nED	NA	NA
8805	Day 90	73.2	1.86451	1.47814	0.169716	O2:LPS	IgA	O2:LPS_IgA	EU	SPT	SPT	nED	NA	NA
8825	Day 0	27.7	1.44248	1	0	O2:LPS	IgA	O2:LPS_IgA	EU	SPT	ST-SPT	nED	44	0
8825	Day 28	108.2	2.03423	3.24631	0.511389	O2:LPS	IgA	O2:LPS_IgA	EU	SPT	ST-SPT	nED	44	0
8825	Day 90	40.6	1.60853	117.244	2.06909	O2:LPS	IgA	O2:LPS_IgA	EU	SPT	ST-SPT	nED	44	0
8834	Day 0	131.8	2.11992	1	0	O2:LPS	IgA	O2:LPS_IgA	EU	SPT	ST-SPT	ED	12.2	1
8834	Day 28	4760.1	3.67762	36.1161	1.5577	O2:LPS	IgA	O2:LPS_IgA	EU	SPT	ST-SPT	ED	12.2	1
8834	Day 90	282.6	2.45117	2.14416	0.331257	O2:LPS	IgA	O2:LPS_IgA	EU	SPT	ST-SPT	ED	12.2	1
8862	Day 0	25.8	1.41078	1	0	O2:LPS	IgA	O2:LPS_IgA	EU	SPT	ST-SPT	ED	14.3	1
8862	Day 28	204.8	2.31122	1.00969	0.00418937	O2:LPS	IgA	O2:LPS_IgA	EU	SPT	ST-SPT	ED	14.3	1
8940	Day 0	61.9	1.79169	1	0	O2:LPS	IgA	O2:LPS_IgA	EU	SPT	ST-SPT	nED	67.9	0
8940	Day 28	62.5	1.79588	4.21086	0.62437	O2:LPS	IgA	O2:LPS_IgA	EU	SPT	ST-SPT	nED	67.9	0
8940	Day 90	47.9	1.68034	0.773829	-0.111355	O2:LPS	IgA	O2:LPS_IgA	EU	SPT	ST-SPT	nED	67.9	0
8949	Day 0	201.7	2.30471	1	0	O2:LPS	IgA	O2:LPS_IgA	EU	SPT	SPT	ED	NA	NA
8949	Day 28	2292.3	3.36027	11.3649	1.05557	O2:LPS	IgA	O2:LPS_IgA	EU	SPT	SPT	ED	NA	NA
8949	Day 90	468.9	2.67108	2.32474	0.366374	O2:LPS	IgA	O2:LPS_IgA	EU	SPT	SPT	ED	NA	NA
8953	Day 0	74.7	1.87332	1	0	O2:LPS	IgA	O2:LPS_IgA	EU	SPT	SPT	nED	NA	NA
8953	Day 28	1313.6	3.11845	17.5843	1.24513	O2:LPS	IgA	O2:LPS_IgA	EU	SPT	SPT	nED	NA	NA
8953	Day 90	128.5	2.1089	1.72021	0.235583	O2:LPS	IgA	O2:LPS_IgA	EU	SPT	SPT	nED	NA	NA
8970	Day 0	107.7	2.03222	1	0	O2:LPS	IgA	O2:LPS_IgA	EU	SPT	SPT-SPT	nED	15.6	0
8970	Day 28	100.2	2.00087	0.930362	-0.031348	O2:LPS	IgA	O2:LPS_IgA	EU	SPT	SPT-SPT	nED	15.6	0
8970	Day 90	95.9	1.98182	0.890436	-0.0503971	O2:LPS	IgA	O2:LPS_IgA	EU	SPT	SPT-SPT	nED	15.6	0
8971	Day 0	309.3	2.49038	1	0	O2:LPS	IgA	O2:LPS_IgA	EU	SPT	ST-SPT	ED	39.5	1
8971	Day 28	1206	3.08135	3.89913	0.590967	O2:LPS	IgA	O2:LPS_IgA	EU	SPT	ST-SPT	ED	39.5	1
8971	Day 90	468.3	2.67052	1.51406	0.180144	O2:LPS	IgA	O2:LPS_IgA	EU	SPT	ST-SPT	ED	39.5	1
8976	Day 0	48.2	1.68305	1	0	O2:LPS	IgA	O2:LPS_IgA	EU	SPT	ST-SPT	nED	12.9	0
8976	Day 28	54.2	1.734	1.12448	0.0509522	O2:LPS	IgA	O2:LPS_IgA	EU	SPT	ST-SPT	nED	12.9	0
8976	Day 90	58.5	1.76716	1.21369	0.0841088	O2:LPS	IgA	O2:LPS_IgA	EU	SPT	ST-SPT	nED	12.9	0
8982	Day 0	117.1	2.06856	1	0	O2:LPS	IgA	O2:LPS_IgA	EU	SPT	SPT	nED	NA	NA
8982	Day 28	195.2	2.29048	1.66695	0.221923	O2:LPS	IgA	O2:LPS_IgA	EU	SPT	SPT	nED	NA	NA
8982	Day 90	114.9	2.06032	0.981213	-0.00823687	O2:LPS	IgA	O2:LPS_IgA	EU	SPT	SPT	nED	NA	NA
