# Supplementary material for: Homologous and heterologous re-challenge with Salmonella Typhi and Salmonella Paratyphi A in a randomised controlled human infection model
Source: PLOS journal article supplement (doi:10.1371/journal.pntd.0008783), 2020-10-20

## Naïve Challenge Group

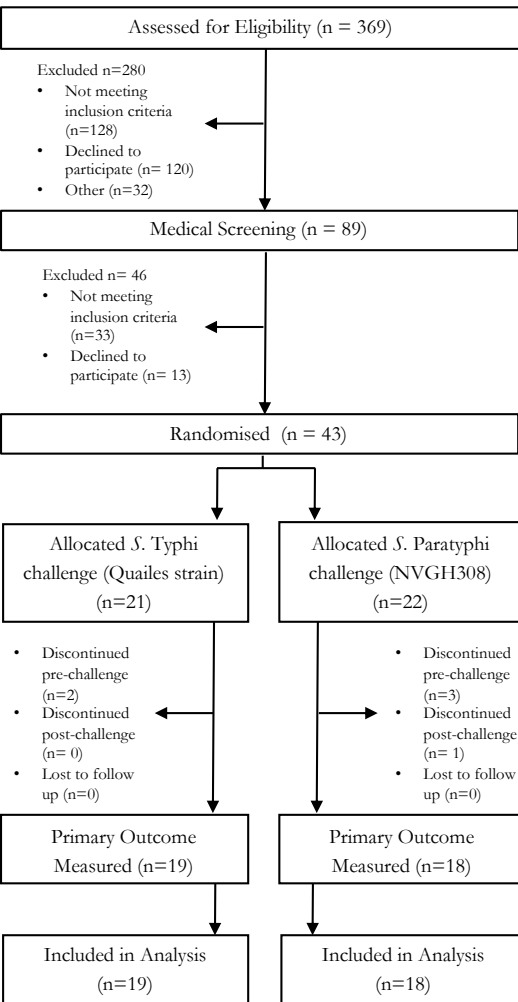

## Previous *Salmonella* Typhi Challenge

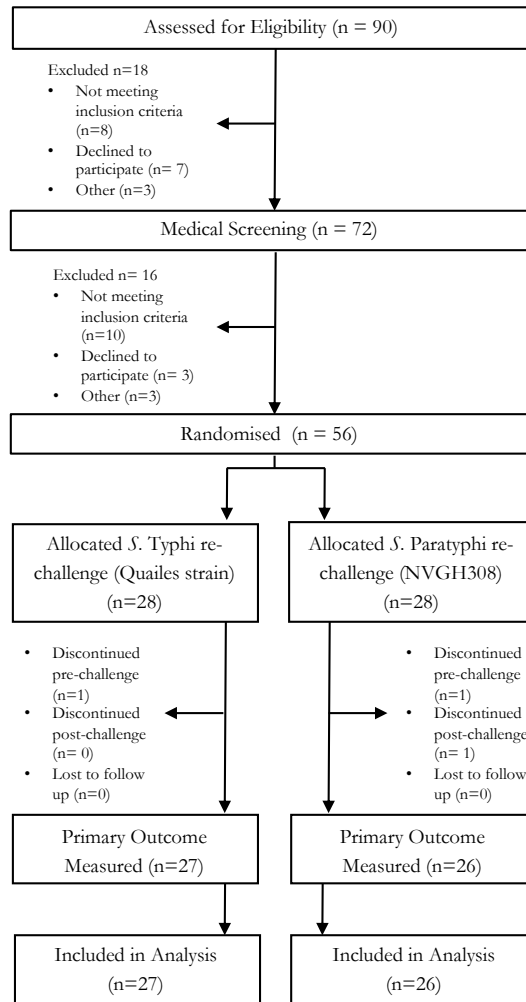

## Previous *Salmonella* Paratyphi Challenge

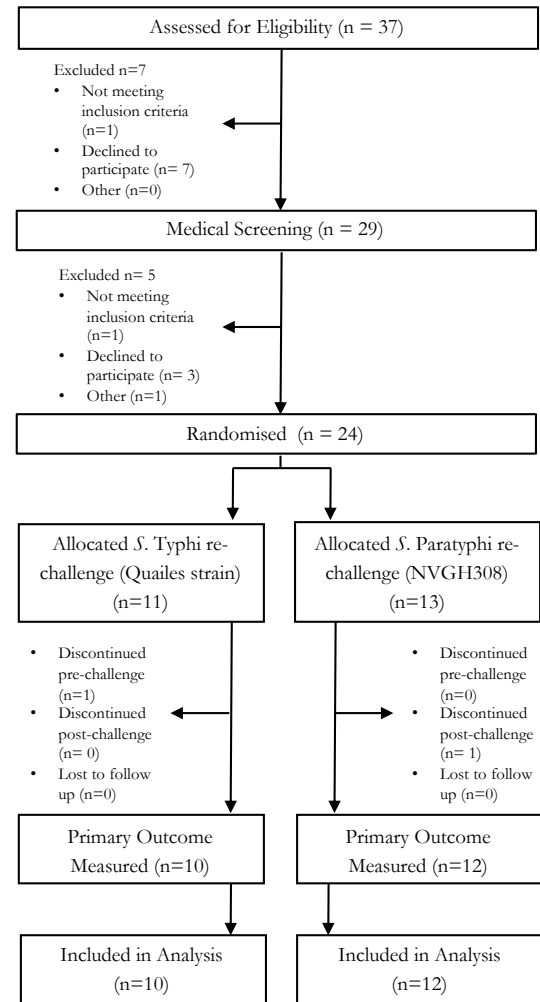

Supplement: S7 (10.1371/journal.pntd.0008783.s007) [file journal.pntd.0008783.s007]
